# Supplementary material for: Water soluble luminescent platinum terpyridine complexes with glycosylated acetylide and arylacetylide ligands: photoluminescent properties and cytotoxicities
Source: Royal Society of Chemistry journal article supplement (doi:10.1039/b507114c), 2005-01-01
Supplement: b507114c.pdf [file b507114c.pdf]

## Electronic Supporting Information

### Water Soluble Luminescent Platinum Terpyridine Complexes with Glycosylated Acetylide and Arylacetylide Ligands. Photoluminescent Properties and Cytotoxicities

Dik-Lung Ma,<sup>a</sup> Tina Yuen-Ting Shum,<sup>a</sup> Fuyi Zhang,<sup>a</sup> Chi-Ming Che<sup>\*a</sup> and Mengsu Yang<sup>b</sup>

<sup>a</sup> Department of Chemistry and Open Laboratory of Chemical Biology of the Institute of Molecular Technology for Drug Discovery and Synthesis, The University of Hong Kong, Pokfulam Road, Hong Kong. E-mail: cmche@hku.hk

<sup>b</sup> Department of Biology and Chemistry, City University of Hong Kong, 83 Tat Chee Avenue, Kowloon, Hong Kong

#### Experimental section

**Materials.** Human serum albumin (HSA), calf thymus DNA (ct DNA) were purchased from Sigma Chemical Co. Ltd. and purified by the literature method.<sup>1</sup> The DNA concentration per base pair and protein concentration were determined by UV/Vis absorption spectroscopy using the following molar extinction coefficients at the indicated wavelengths: calf thymus DNA,  $\epsilon_{260} = 13200 \text{ bp cm}^{-1} \text{ M}^{-1}$ ;<sup>2</sup> HSA,  $\epsilon_{279} = 35300 \text{ cm}^{-1} \text{ M}^{-1}$ . A plasmid DNA, pDR2 (10.7 kb), was purchased from Clontech Laboratories Inc. (Palo Alto, USA). Unless otherwise stated, DNA binding experiments were performed in aerated Tris buffer solutions (5 mM Tris, 50 mM NaCl, pH 7.2) at 20 °C.  $\text{K}_2\text{PtCl}_4$  and  ${}^t\text{Bu}_3\text{terpy}$  (4,4',4''-tri-*tert*-butyl-2,2':6',2''-terpyridine) were obtained from Aldrich. Pentaacetated  $\beta$ -D-glucopyranose,  $\beta$ -D-galactopyranose and heptaacetated  $\beta$ -D-lactose,  $\beta$ -D-maltose were prepared using the established methods.<sup>3</sup> 2',3',4',6',2,3,6-hepta-*O*-acetyl- $\alpha$ -bromo-D-maltopyranose was prepared using the established Fischer protocol.<sup>4</sup> Reagents and solvents were reagent grade. Solvent evaporation was performed under reduced pressure below 40 °C using rotary evaporation and some residues were followed by evacuation to constant sample weight.  $[\text{Pt}(\text{terpy})\text{Cl}](\text{CF}_3\text{SO}_3)$  (**9**) and  $[\text{Pt}({}^t\text{Bu}_3\text{terpy})\text{Cl}](\text{CF}_3\text{SO}_3)$  were prepared by literature method.<sup>5</sup> The stock solutions (10 mM) of  $\text{Pt}^{\text{II}}$  complexes for titration studies were prepared in either DMSO or MeCN, and further dilution to designated concentrations was made using deionised water. All the stock solutions were kept at -20 °C in the dark between experiments.

HepG2 (hepatocellular cancer),<sup>6</sup> HeLa (human cervix epitheloid carcinoma), NCI-H460 (lung cancer), MCF-7 (breast cancer) and 293 (normal kidney) cells were obtained from American Type Culture Collection. SF-268 (brain cancer) was obtained from National Cancer Institute of NIH, USA. Cell proliferation Kit I (MTT) from Roche was used for cytotoxicity evaluation.

**Physical measurement.** Absorption spectra were recorded on a Perkin-Elmer Lambda 19 UV/Visible spectrophotometer. Emission spectra were recorded on a SPEX Fluorolog-2 Model fluorescence spectrophotometer. Emission lifetime measurements were performed with a Quanta Ray DCR-3 pulsed Nd:YAG laser system (pulse output 355 nm, 8 ns). Error limits were estimated:  $\lambda$  ( $\pm 1 \text{ nm}$ );  $\tau$  ( $\pm 10\%$ );  $\phi$  ( $\pm 10\%$ ).  ${}^1\text{H}$  and  ${}^{13}\text{C}$  NMR spectra were recorded on a Bruker DPX-300 NMR spectrometer. Positive-ion mass spectra were recorded on a Finnigan MAT95 mass spectrometer. Elemental analysis was performed by the Institute of Chemistry at the Chinese Academy of Sciences, Beijing. Infrared spectra were recorded as Nujol mulls on a Bio-Rad FT-IR spectrometer. Flow

cytometry measurements were performed with an EPICS XL cytometer (Coulter Corporation, Miami, FL) equipped with an argon laser.

**Spectroscopic titration.** Solutions of the platinum(II) complexes (50  $\mu\text{M}$ ) were prepared in Tris buffer solutions (5 mM Tris, 50 mM NaCl, pH 7.2). Aliquots of a millimolar stock ct DNA solution (0–500  $\mu\text{M}$ ) were added. Absorption spectra were recorded in the 200–600 nm range, after equilibration at 20.0 °C for 10 min. Emission spectra were recorded in the 400–800 nm range, after equilibration at 20.0 °C for 10 min. The intrinsic binding constant,  $K$ , was determined from a plot of  $D/\Delta\epsilon_{\text{ap}}$  vs  $D$  according to equation (1):<sup>7</sup>

$$D/\Delta\epsilon_{\text{ap}} = D/\Delta\epsilon + 1/(\Delta\epsilon \times K) \quad (1)$$

where  $D$  is the concentration of DNA,  $\Delta\epsilon_{\text{ap}} = |\epsilon_{\text{A}} - \epsilon_{\text{F}}|$ ,  $\epsilon_{\text{A}} = A_{\text{obs}}/[\text{complex}]$ , and  $\Delta\epsilon = |\epsilon_{\text{B}} - \epsilon_{\text{F}}|$ ;  $\epsilon_{\text{B}}$  and  $\epsilon_{\text{F}}$  correspond to the extinction coefficients of DNA–complex adduct and unbound complex, respectively.

**Restriction endonuclease fragmentation assay.** Digestion of a plasmid pDR2 DNA (10.7 kb) with a restriction enzyme, Apal (Boehringer Mannheim), was performed by mixing the DNA (21 nM bp<sup>-1</sup>) in 1× SuRE/Cut Buffer A with Apal (1 unit/ $\mu\text{L}$ ), followed by incubation at 37 °C for 1 h.<sup>7</sup> A mixture of ethidium bromide (4  $\mu\text{M}$ ), Hoechst 33342 (200  $\mu\text{M}$ ), cisplatin (*cis*-[Pt(NH<sub>3</sub>)<sub>2</sub>Cl<sub>2</sub>]) (200  $\mu\text{M}$ ), **1** (4  $\mu\text{M}$ ) and pDR2 (10.7 kbp, 21 nM bp<sup>-1</sup>) in digestion buffer was first incubated at room temperature for 5 min followed by addition of restriction enzyme (1 unit/ $\mu\text{L}$ ). Two controls of pDR2 in the absence and presence of restriction enzyme in digestion buffer were prepared. All the solutions were incubated at 37 °C for 1 h; after restriction enzyme digestion the samples were analysed by agarose gel electrophoresis.

**Gel mobility shift assay.** A 100-bp PCR product (15.2  $\mu\text{M}$  bp<sup>-1</sup>) was mixed with the metal complex at various DNA:complex ratios (1:10, 1:5 and 1:2.5). The mixture was analysed by gel electrophoresis (Pharmacia Biotech GNA-200 submarine unit with Power Pac 300 power supply, Bio-Rad) using a 2% (w/v) agarose gel and 1× Tris-acetate-EDTA (TAE) buffer (40 mM Tris-acetate, 1 mM EDTA, 50 mM NaCl).

**Cytotoxicity test (MTT (3-(4,5-dimethylthiazol-2-yl)-2,5-tetrazolium bromide) assay).** Cells were seeded in a 96-well flat-bottomed microplate at 20000 cells/well in 150  $\mu\text{L}$  of growth medium solution (10% fetal calf serum (FCS, Gibco), 1% Sigma A-7292 Antibiotic and Antimycotic Solution in minimal essential medium (MEM-Eagle, Sigma)). Complexes **1–9** and cisplatin (positive control) were dissolved in DMSO (dimethyl sulfoxide) and mixed with the growth medium (final concentration  $\leq$  4% DMSO). Serial dilution of each complex was added to each well. The microplate was incubated at 37 °C, 5% CO<sub>2</sub>, 95% air in a humidified incubator for 48 h. After incubation, 10  $\mu\text{L}$  MTT reagent (5 mg/mL) was added to each well. The microplate was re-incubated at 37 °C in 5% CO<sub>2</sub> for 4 h. Solubilization solution (10% SDS in 0.01 M HCl) (100  $\mu\text{L}$ ) was added to each well. The microplate was left in an incubator for 24 h. Absorbances at 550 nm were measured by a microplate reader. The IC<sub>50</sub> values of **1–9** (concentration required to reduce the absorbance by 50% compared to the controls) were determined by the dose-dependence of surviving cells after exposure to the metal complex for 48 h.

**Flow cytometric analysis.** The sheath fluid was an isotonic solution (Isoflow Coulter 8547008, Coulter Corporation). An excitation wavelength of 488 nm at 15 mW was used. About 10,000 cells were analysed in each sample. Cancer cells (NCI-H460 cell line) were cultured at a concentration of approximately  $2 \times 10^5$  cells/mL. Complex **1** (0.1  $\mu\text{M}$ ) was added to the cultures. Staurosporin *Streptomyces* was used as positive control. After treatment, the cultures were incubated in 5% CO<sub>2</sub> at

37 °C. Cells were collected at 8 h interval. The genomic DNA was extracted according to the literature method,<sup>1</sup> and analysed by Annexin V plus PI staining.

**cDNA microarray analysis.**  $3 \times 10^7$  cells were seeded in a 140 mm cell culture plate. Complex **1** (0.1  $\mu$ M) was added to the cultures. Untreated cells were used as control. After treatment, the cultures were incubated in 5% CO<sub>2</sub> at 37 °C. Cells were collected at 8 h interval. TRIZOL reagent (Invitrogen, Gaithersburg, MD) was used to extract total RNA from the cultures according to the manufacturer's protocol.<sup>8</sup> Total RNA from control or treated cells were reverse-transcribed to cDNA in the presence of SuperScript II reverse transcriptase. During the reaction, two distinct fluorescent dyes, Cy3-dUTP and Cy5-dUTP (Amersham Pharmacia Biotech), were incorporated into the cDNA of the control and treated samples, respectively. The Cy3 and Cy5 labelled cDNA were combined and purified using Microcon 30 column (Microcon, MA) to final volume as 9  $\mu$ L. The cDNA sample was mixed with a hybridization solution containing 1  $\mu$ L of each of the following reagents: poly (dA) (8 mg/L), human Cot-1 DNA (4 mg/L), yeast tRNA (10 mg/L) and 3  $\mu$ L of 20 $\times$  SSC as well as 0.2  $\mu$ L of 10% SDS. The mixture was then denatured at 100 °C for 2 min and applied to a microarray slide. Hybridization was performed at 65 °C for 16 h. Microarray images from two-color fluorescence hybridization were scanned with a confocal laser scanner (ScanArray 4000, GSI Lumonics, MA). The microarray results were analysed by using ScanAlyze (Michael Eisen, Stanford University). Fluorescent images were gridded to locate the spot corresponding to each gene. Fluorescence and background intensities for both Cy3 and Cy5 wavelengths were extracted for data normalization and analysis. The raw data were filtered according to the following criteria: spots with small diameters (< 120 microns), low signal intensity (< 300 fluorescence intensity units), and low signal to noise ratio (< 1.5) were discarded. To ensure the reproducibility of the microarray results, the experiment was repeated with newly extracted total RNA samples. Fluorescence ratios (Cy5/Cy3) were used to determine the relative level of gene expression. Genes showed a greater than 2-fold induction or repression (Cy5/Cy3 ratios above 2 or below 0.5) were selected for further analysis.

**Preparation of 4-ethynylphenoxy 2,3,4,6-tetra-*O*-acetyl- $\beta$ -D-glucopyranoside (HL3)**

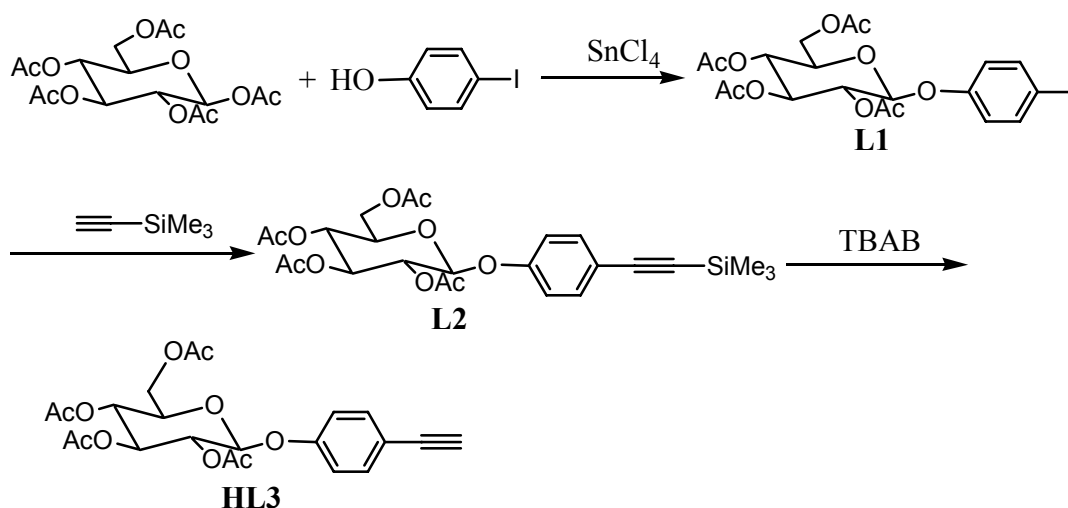

**(a) 4-Iodophenyl 2,3,4,6-tetra-*O*-acetyl- $\beta$ -D-glucopyranoside (**L1**).** To a solution of  $\beta$ -D-glucopyranoside pentaacetate<sup>3</sup> (2 g, 5.13 mmol) and 4-iodophenol (1.58 g, 7.18 mmol) in dry

dichloromethane (10 mL) was added  $\text{SnCl}_4$  (1.8 mL, 15.4 mmol). The reaction was stirred at room temperature. After completion of the reaction (monitored by TLC, petroleum/ethyl acetate = 2:1), the mixture was neutralised with aqueous  $\text{NaHCO}_3$  and diluted with dichloromethane (20 mL). The solution was filtered through Celite and the filtered cake was washed with dichloromethane (10 mL). The organic phase was washed with brine, dried over  $\text{Na}_2\text{SO}_4$ , and evaporated. Flash column chromatography of the residue (hexane/ethyl acetate = 2:1) afforded a white solid, which was recrystallised from ethanol to give **L1** (1.20 g, 43%): Mp 182–183 °C,  $[\alpha]_D = -8.0$  ( $c = 0.4$ ,  $\text{CHCl}_3$ ). IR ( $\text{cm}^{-1}$ , KBr): 3027 ( $\nu_{\text{ArH}}$ ), 2962 ( $\nu_{\text{C-H}}$ ), 1747 ( $\nu_{\text{C=O}}$ ).  $^1\text{H}$  NMR (400 MHz,  $\text{CDCl}_3$ ):  $\delta$  2.03 (s, 3H), 2.05 (s, 3H), 2.06 (s, 3H), 2.08 (s, 3H) ( $\text{OCOCH}_3$ ), 3.82–3.87 (m, 1H, H-5), 4.16 (dd, 1H,  $J_{6a,5} = 2.4$  Hz,  $J_{6a,6b} = 12.0$  Hz, H-6a), 4.27 (dd, 1H,  $J_{6b,5} = 5.2$  Hz,  $J_{6b,6a} = 12.0$  Hz, H-6b), 5.04 (d, 1H,  $J_{1,2} = 8.0$  Hz, H-1), 5.16 (t, 1H,  $J_{4,5} = J_{4,3} = 9.2$  Hz, H-4), 5.27–5.29 (m, 2H, H-2, H-3), 6.77 (d, 2H,  $J = 7.2$  Hz, ArH), 7.58 (d, 2H,  $J = 7.2$  Hz, ArH).  $^{13}\text{C}$  NMR (100 MHz,  $\text{CDCl}_3$ ):  $\delta$  20.7–20.8 ( $\text{CH}_3$ ), 62.1 (C-6), 68.4 (C-4), 71.3 (C-3), 72.3 (C-5), 72.8 (C-2), 99.1 (C-1), 86.3, 119.4, 138.6, 156.8 (Ar), 169.3, 169.5, 170.3, 170.6 (CO). HRMS: Calcd. for  $\text{C}_{20}\text{H}_{24}\text{IO}_{10}$  ( $\text{M}^+ + 1$ ): 551.0414, found: 551.0414. Anal. Calcd. for  $\text{C}_{20}\text{H}_{23}\text{IO}_{10}$ : C, 43.65; H, 4.21. Found: C, 43.47; H, 4.18.

**(b) 4-[(Trimethylsilyl)ethynyl]phenoxy 2,3,4,6-tetra-O-acetyl- $\beta$ -D-glucopyranoside (L2).** **L1** (0.8 g, 1.45 mmol) was dissolved in dry THF followed by addition of palladium acetate (18 mg,  $8.0 \times 10^{-5}$  mol), copper(I) iodide (12 mg,  $6.3 \times 10^{-5}$  mol) and triphenylphosphine (30 mg,  $1.1 \times 10^{-3}$  mol). The resulting solution was degassed with  $\text{N}_2$  for 30 min and (trimethylsilyl)acetylene (0.23 mL, 1.62 mmol) was added. The mixture was stirred overnight at room temperature and filtered. The filtrate was evaporated and the residue was purified by column chromatography (hexane/ethyl acetate = 4:1→2:1) to afford a white solid, which was recrystallised from ethanol to give **L2** (0.63 g, 88%): Mp 213–214 °C. IR ( $\text{cm}^{-1}$ , KBr): 3061 ( $\nu_{\text{ArH}}$ ), 2961, 2899 ( $\nu_{\text{C-H}}$ ), 2158 ( $\nu_{\text{C}\equiv\text{C}}$ ), 1746 ( $\nu_{\text{C=O}}$ ).  $^1\text{H}$  NMR (300 MHz,  $\text{CDCl}_3$ ):  $\delta$  0.24 (s, 9H,  $\text{SiMe}_3$ ), 2.04 (s, 3H), 2.05 (s, 3H), 2.06 (s, 3H), 2.08 (s, 3H) ( $\text{OCOCH}_3$ ), 3.87 (ddd, 1H,  $J_{5,6b} = 2.4$  Hz,  $J_{5,6a} = 5.4$  Hz,  $J_{5,4} = 9.3$  Hz, H-5), 4.16 (dd, 1H,  $J_{6a,5} = 2.4$  Hz,  $J_{6a,6b} = 12.8$  Hz, H-6a), 4.28 (dd, 1H,  $J_{6b,5} = 5.4$  Hz,  $J_{6b,6a} = 12.8$  Hz, H-6b), 5.08 (d, 1H,  $J_{1,2} = 7.5$  Hz, H-1), 5.16 (t, 1H,  $J_{4,3} = J_{4,5} = 9.3$  Hz, H-4), 5.26–5.30 (m, 2H, H-2, H-3), 6.90 (d, 2H,  $J = 7.2$  Hz, ArH), 7.41 (d, 2H,  $J = 7.0$  Hz, ArH).  $^{13}\text{C}$  NMR (100 MHz,  $\text{CDCl}_3$ ):  $\delta$  20.7–20.8 ( $\text{CH}_3$ ), 62.1 (C-6), 68.4 (C-4), 71.3 (C-3), 72.3 (C-5), 72.8 (C-2), 93.7 ( $\text{C}\equiv\text{C-SiMe}_3$ ), 98.9 (C-1), 104.6 ( $\text{C}\equiv\text{C-SiMe}_3$ ), 116.8, 118.4, 133.6, 156.9 (Ar), 169.4, 169.5, 170.3, 170.7 (CO). HRMS: Calcd. for  $\text{C}_{25}\text{H}_{33}\text{O}_{10}\text{Si}$  ( $\text{M}^+ + 1$ ): 521.1843, found: 521.1909. Anal. Calcd. for  $\text{C}_{25}\text{H}_{32}\text{O}_{10}\text{Si}$ : C, 57.68; H, 6.20. Found: C, 57.66; H, 6.21.

**(c) 4-Ethynylphenoxy 2,3,4,6-tetra-O-acetyl- $\beta$ -D-glucopyranoside (HL3).** **L2** (0.5 g, 0.96 mmol) was dissolved in dry dichloromethane (10 mL) and degassed for 10 min. Tetrabutylammonium fluoride (1.15 mL, 1.15 mmol) was added. The mixture was stirred at room temperature. After completion of the reaction (monitored by TLC, hexane/ethyl acetate = 1:1), the mixture was washed with brine, dried over  $\text{Na}_2\text{SO}_4$ , and evaporated. Flash column chromatography (hexane:ethyl acetate = 2:1) of the residue afforded a pale yellow solid (0.29 g, 64%): Mp 203–205 °C,  $[\alpha]_D = -14.7$  ( $c = 0.4$ ,  $\text{CHCl}_3$ ). IR ( $\text{cm}^{-1}$ , KBr): 3286 ( $\nu_{\text{C}\equiv\text{CH}}$ ), 3061 ( $\nu_{\text{ArH}}$ ), 2945 ( $\nu_{\text{C-H}}$ ), 2108 ( $\nu_{\text{C}\equiv\text{C}}$ ), 1752 ( $\nu_{\text{C=O}}$ ).  $^1\text{H}$  NMR (300 MHz,  $\text{CDCl}_3$ ):  $\delta$  2.04 (s, 3H), 2.05 (s, 3H), 2.06 (s, 3H), 2.07 (s, 3H) ( $\text{OCOCH}_3$ ), 3.03 (s, 1H,  $\text{C}\equiv\text{CH}$ ), 3.84–3.90 (m, 1H, H-5), 4.17 (dd, 1H,  $J_{6a,5} = 2.4$  Hz,  $J_{6a,6b} = 12.3$  Hz, H-6a), 4.28 (dd, 1H,  $J_{6b,5} = 5.4$  Hz,  $J_{6b,6a} = 12.3$  Hz, H-6b), 5.10 (d, 1H,  $J_{1,2} = 7.5$  Hz, H-1), 5.16 (t, 1H,  $J_{4,5} = J_{4,3} = 9.6$  Hz, H-4), 5.27–5.34 (m, 2H, H-2 and H-3), 6.93 (d, 2H,  $J = 8.7$  Hz, ArH), 7.43 (d, 2H,  $J = 8.7$  Hz, ArH).  $^{13}\text{C}$  NMR (100 MHz,  $\text{CDCl}_3$ ):  $\delta$  20.7–20.8 ( $\text{CH}_3$ ), 62.1 (C-6), 68.4 (C-4), 71.2 (C-3), 72.3 (C-5), 72.8 (C-2), 76.7 ( $\text{C}\equiv\text{CH}$ ), 83.1 ( $\text{C}\equiv\text{CH}$ ), 98.8 (C-1), 116.9, 117.2, 133.7, 157.1 (Ar), 169.4, 169.5, 170.3, 170.6 (CO). HRMS: Calcd. for  $\text{C}_{22}\text{H}_{25}\text{O}_{10}$  ( $\text{M}^+ + 1$ ): 449.1448, found: 449.1448. Anal. Calcd. for  $\text{C}_{22}\text{H}_{24}\text{O}_{10}$ : C, 58.93; H, 5.39. Found: C, 58.82; H, 5.42.

**Preparation of 2-propynyl 3,4,6-triacetate-2-acetamido-2-deoxy- $\beta$ -D-glucopyranoside (HL4).**

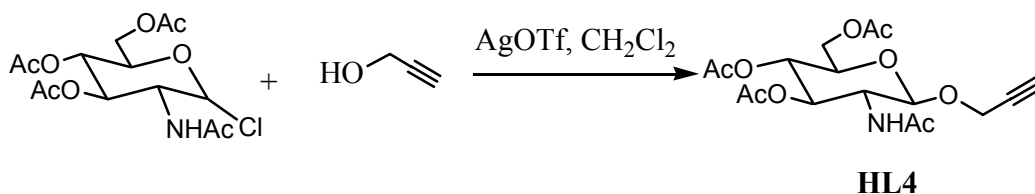

To a solution of 2,4,6-triacetate 2-acetamido-2-deoxy- $\alpha$ -D-glucopyranosyl chloride (2.0 g, 5.47 mmol) and propargyl alcohol (0.64 mL, 10.94 mmol) in dry dichloromethane (20 mL) at  $-10^{\circ}\text{C}$  was added AgOTf (1.54 g, 6.0 mmol). After completion of the reaction (monitored by TLC, petroleum/ethyl acetate = 2:1), the mixture was neutralised with aqueous  $\text{NaHCO}_3$ , filtered, and the filtered cake was washed with dichloromethane. The resulting solution was separated and the water phase extracted with dichloromethane ( $2 \times 5$  mL). The combined organic solution was washed with brine and dried over  $\text{Na}_2\text{SO}_4$ . Removal of the solvent followed by purification with column chromatography (petroleum/ethyl acetate = 3:1) gave the product as a white solid (1.2 g, 57%): Mp  $251\text{--}253^{\circ}\text{C}$ ,  $[\alpha]_{\text{D}} = -49.0$  ( $c = 0.4$ ,  $\text{CHCl}_3$ ). IR ( $\text{cm}^{-1}$ , KBr): 3285 ( $\nu_{\text{C}\equiv\text{CH}}$ ), 3246 ( $\nu_{\text{NH}}$ ), 2129 ( $\nu_{\text{C}\equiv\text{C}}$ ), 1747 ( $\nu_{\text{C}=\text{O}}$ ).  $^1\text{H}$  NMR (400 MHz,  $\text{CDCl}_3$ ):  $\delta$  1.94 (s, 3H), 2.03 (s, 3H), 2.05 (s, 3H), 2.09 (s, 3H) ( $\text{OCOCH}_3$ ), 2.50 (t, 1H,  $J = 2.5$  Hz,  $\text{C}\equiv\text{CH}$ ), 3.73–3.75 (m, 1H, H-5), 3.96 (dd, 1H,  $J_{2,3} = 10.0$  Hz,  $J_{2,1} = 8.5$  Hz, H-2), 4.15 (dd, 1H,  $J_{6a,5} = 2.5$  Hz,  $J_{6a,6b} = 12.5$  Hz, H-6a), 4.28 (dd, 1H,  $J_{6b,5} = 5.0$  Hz,  $J_{6b,6a} = 12.5$  Hz, H-6b), 4.38 (s, 2H,  $\text{OCH}_2$ ), 4.87 (d, 1H,  $J_{1,2} = 8.5$  Hz, H-1), 5.09 (t, 1H,  $J_{4,3} = J_{4,5} = 10.0$  Hz, H-4), 5.30 (t, 1H,  $J_{3,2} = J_{3,4} = 10.0$  Hz, H-3), 5.86 (br s, 1H, NH).  $^{13}\text{C}$  NMR (100 MHz,  $\text{CDCl}_3$ ):  $\delta$  20.6, 20.7, 20.8, 23.3 ( $\text{CH}_3$ ), 54.2 (C-2), 55.9 ( $\text{CH}_2\text{O}$ ), 62.0 (C-6), 68.5 (C-4), 71.9 (C-5), 72.4 (C-3), 75.4 ( $\text{C}\equiv\text{CH}$ ), 78.5 ( $\text{C}\equiv\text{CH}$ ), 98.4 (C-1), 169.4, 170.4, 170.7, 170.9 (CO). HRMS: Calcd. for  $\text{C}_{17}\text{H}_{24}\text{NO}_9$  ( $M^+ + 1$ ): 386.1451, found: 386.1451. Anal. Calcd. for  $\text{C}_{17}\text{H}_{23}\text{NO}_9$ : C, 52.98; H, 6.02; N, 3.63. Found: C, 52.74; H, 6.04; N, 3.65.

**Preparation of 1-(2-Prop-1-ynyl)-(2,3,4,6-tetra-*O*-acetyl- $\alpha$ -D-glucopyranosyl)-(1 $\rightarrow$ 4)-2,3,6-tri-*O*-acetyl- $\beta$ -D-glucopyranoside (HL5).<sup>9</sup>**

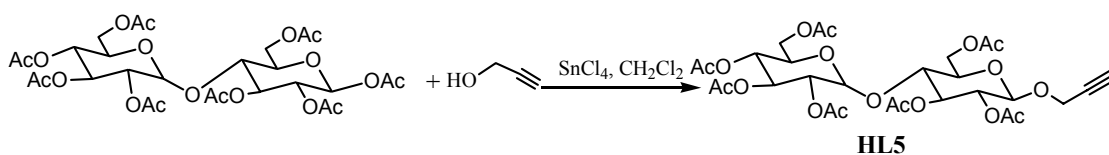

To a solution of  $\beta$ -D-maltose pentaacetate (12.0 g, 17.7 mmol) in dichloromethane (80 mL) was added  $\text{SnCl}_4$  (2.1 mL, 17.7 mmol) with stirring at room temperature. After 10 min, propargyl alcohol (2 mL, 34.4 mmol) was added. On reaction completion (monitored by TLC, petroleum/ethyl acetate = 2:1), the reaction mixture was quenched with aqueous  $\text{NaHCO}_3$ , filtered, and washed with dichloromethane. The filtrate was separated and aqueous phase was extracted with dichloromethane ( $2 \times 20$  mL). The combined organic phase was dried over  $\text{Na}_2\text{SO}_4$  and evaporated. Flash column chromatography (petroleum/ethyl acetate = 2:1) of the residue afforded **HL5** (6.5 g, 55%): Mp  $104\text{--}105^{\circ}\text{C}$ ,  $[\alpha]_{\text{D}} = +45.9$  ( $c = 1.0$ ,  $\text{CHCl}_3$ ). IR ( $\text{cm}^{-1}$ , KBr): 3295 ( $\nu_{\text{C}\equiv\text{CH}}$ ), 2122 ( $\nu_{\text{C}\equiv\text{C}}$ ), 1751 ( $\nu_{\text{C}=\text{O}}$ ).  $^1\text{H}$  NMR (400 MHz,  $\text{CDCl}_3$ ):  $\delta$  2.00–2.15 (seven singlets, 21H,  $\text{OCOCH}_3$ ), 2.51 (t, 1H,  $J = 2.0$  Hz,  $\text{C}\equiv\text{CH}$ ), 3.71–3.74 (m, 1H, H-5'), 3.94–3.97 (m, 1H, H-5), 4.03–4.06 (m, 2H, H-6a', H-4), 4.23–4.26 (m, 2H, H-6b', H-6a), 4.35 (d, 2H,  $J = 2.0$  Hz,  $\text{OCH}_2$ ), 4.49 (dd, 1H,  $J_{6b,5} = 2.8$  Hz,  $J_{6b,6a} = 12.0$  Hz,

H-6b), 4.80 (d, 1H,  $J = 8.0$  Hz, H-1), 4.84–4.87 (m, 2H, H-2, H-2'), 5.05 (t, 1H,  $J_{4,3} = J_{4,5} = 10.0$  Hz, H-4'), 5.28 (t, 1H,  $J_{3,2} = J_{3,4} = 9.2$  Hz, H-3), 5.36 (t, 1H,  $J_{3',2'} = J_{3',4'} = 10.0$  Hz, H-3'), 5.41 (d, 1H,  $J_{1',2'} = 4.0$  Hz, H-1'). HRMS: Calcd. for  $C_{29}H_{39}O_{18}$  ( $M^+ + 1$ ): 675.2136, found: 675.2136. Anal. Calcd. for  $C_{29}H_{38}O_{18}$ : C, 51.63; H, 5.68. Found: C, 51.41; H, 5.66.

**Preparation of 4-ethynylphenoxy 2',3',4',6',2,3,6-hepta-O-acetyl- $\beta$ -D-maltopyranoside (HL7).**

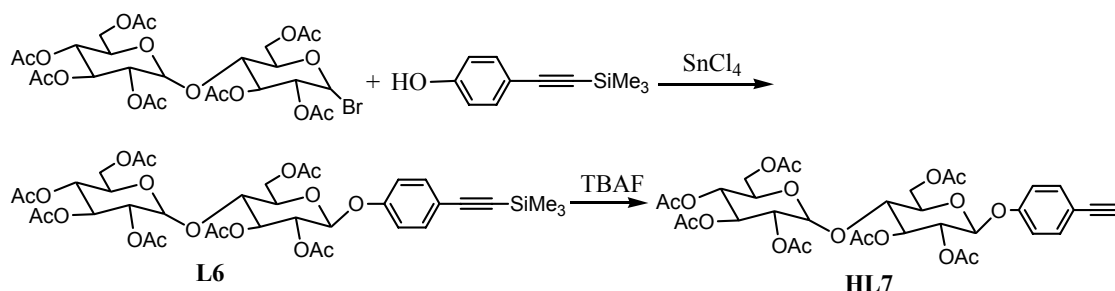

**(a) [(Trimethylsilyl)ethynyl]phenoxy 2',3',4',6',2,3,6-hepta-O-acetyl- $\beta$ -D-maltopyranoside (L6).** To a solution of 2',3',4',6',2,3,6-hepta-O-acetyl- $\alpha$ -bromo-D-maltopyranose (3.0 g, 4.26 mmol) and 4-trimethylsilylphenol<sup>10</sup> (0.96 g, 5.10 mmol) in dry dichloromethane (20 mL) and triethylamine (30 mL) was added  $Ag_2O$  (3.0 g, 12.9 mmol). The reaction mixture was stirred at room temperature. On reaction completion (TLC, hexane/ethyl acetate = 1:1), the mixture was filtered and the filtered cake was washed with dichloromethane ( $2 \times 10$  mL). The solvent was evaporated and the residue was purified by flash column chromatography (hexane/ethyl acetate = 2:1) to give a white solid (1.91 g, 55%): Mp 202–203 °C,  $[\alpha]_D = +47.6$  ( $c = 1.0$ ,  $CHCl_3$ ). IR ( $cm^{-1}$ , KBr): 2965 ( $\nu_{C-H}$ ), 2156 ( $\nu_{C\equiv C}$ ), 1751 ( $\nu_{C=O}$ ).  $^1H$  NMR (400 MHz,  $CDCl_3$ ):  $\delta$  0.24 (s, 9H,  $SiMe_3$ ), 2.00–2.10 (seven singlets, 21H,  $OCOCH_3$ ), 3.87–3.91 (m, 1H, H-5), 3.96–3.98 (m, 1H, H-5'), 4.04–4.12 (m, 2H, H-6a', H-4), 4.23–4.28 (m, 2H, H-6b', H-6a), 4.47 (dd, 1H,  $J_{6b,5} = 2.4$  Hz,  $J_{6b,6a} = 12.0$  Hz, H-6b), 4.87 (dd, 1H,  $J_{2',1'} = 4.0$  Hz,  $J_{2',3'} = 10.0$  Hz, H-2'), 5.05 (t, 1H,  $J_{4',3'} = J_{4',5'} = 10.0$  Hz, H-4'), 5.09 (t, 1H,  $J_{2,1} = J_{2,3} = 8.0$  Hz, H-2), 5.14 (d, 1H,  $J_{1,2} = 8.0$  Hz, H-1), 5.32 (t, 1H,  $J_{3,2} = J_{3,4} = 8.0$  Hz, H-3), 5.37 (t, 1H,  $J_{3',2'} = J_{3',4'} = 10.0$  Hz, H-3'), 5.43 (d, 1H,  $J_{1',2'} = 4.0$  Hz, H-1'), 6.90 (d, 2H,  $J = 8.4$  Hz, ArH), 7.40 (d, 2H,  $J = 8.4$  Hz, ArH).  $^{13}C$  NMR (125 MHz,  $CDCl_3$ ):  $\delta$  20.6–20.9 ( $CH_3$ ), 61.6 (C-6'), 62.8 (C-6), 68.0 (C-4'), 68.6 (C-5'), 69.3 (C-3'), 70.0 (C-2'), 71.9 (C-2), 72.4 (C-5), 72.7 (C-4), 75.3 (C-3), 93.6 ( $C\equiv C-SiMe_3$ ), 95.7 (C-1'), 98.1 (C-1), 104.4 ( $C\equiv C-SiMe_3$ ), 116.7, 118.2, 133.5, 156.6 (Ar), 169.4, 169.6, 170.0, 170.2, 170.4, 170.5 (CO). HRMS: Calcd. for  $C_{37}H_{49}O_{18}Si$  ( $M^+ + 1$ ): 809.2688, found: 809.2688. Anal. Calcd. for  $C_{37}H_{48}O_{18}Si$ : C, 54.94; H, 5.98. Found: C, 54.84; H, 6.01.

**(b) 4-Ethynylphenoxy 2',3',4',6',2,3,6-hepta-O-acetyl- $\beta$ -D-maltopyranoside (HL7).** L6 (1.0 g,  $1.24 \times 10^{-3}$  mol) was dissolved in dichloromethane (15 mL) and the solution was degassed for 10 min. Tetrabutylammonium fluoride (1.48 mL,  $1.49 \times 10^{-3}$  mol) was added and the mixture was stirred at room temperature. After completion of the reaction (monitored by TLC, hexane/ethyl acetate = 1:1), the mixture was washed with brine, dried over  $Na_2SO_4$ , and evaporated. The residue was purified by flash column chromatography (hexane/ethyl acetate = 2:1) to afford a white solid: (0.65 g, 71%). Mp 254–255 °C,  $[\alpha]_D = +46.3$  ( $c = 1.0$ ,  $CHCl_3$ ). IR ( $cm^{-1}$ , KBr): 3283 ( $\nu_{C\equiv CH}$ ), 3010 ( $\nu_{ArH}$ ), 2959 ( $\nu_{C-H}$ ), 2109 ( $\nu_{C\equiv C}$ ), 1752 ( $\nu_{C=O}$ ).  $^1H$  NMR (400 MHz,  $CDCl_3$ ):  $\delta$  2.01 (s, 3H), 2.03 (s, 3H), 2.04 (s, 3H), 2.05 (s, 3H), 2.08 (s, 3H), 2.09 (s, 3H), 2.10 (s, 3H) ( $OCOCH_3$ ), 3.03 (s, 1H,

C≡CH), 3.87–3.91 (m, 1H, H-5), 3.96–3.99 (m, 1H, H-5'), 4.04–4.12 (m, 2H, H-6a', H-4), 4.23–4.28 (m, 2H, H-6b', H-6a), 4.47 (dd, 1H,  $J_{6b,5} = 2.8$  Hz,  $J_{6b,6a} = 12.0$  Hz, H-6b), 4.87 (dd, 1H,  $J_{2,1'} = 4.0$  Hz,  $J_{2,3'} = 10.0$  Hz, H-2'), 5.05 (t, 1H,  $J_{4',3'} = J_{4',5'} = 10.0$  Hz, H-4'), 5.09 (t, 1H,  $J_{2,3} = J_{2,1} = 8.0$  Hz, H-2), 5.14 (d, 1H,  $J_{1,2} = 8.0$  Hz, H-1), 5.32 (t, 1H,  $J_{3,2} = J_{3,4} = 8.0$  Hz, H-3), 5.37 (t, 1H,  $J_{3',2'} = J_{3',4'} = 10.0$  Hz, H-3'), 5.44 (d, 1H,  $J_{1',2'} = 4.0$  Hz, H-1'), 6.92 (d, 2H,  $J = 8.8$  Hz, ArH), 7.43 (d, 2H,  $J = 8.8$  Hz, ArH).  $^{13}\text{C}$  NMR (125 MHz,  $\text{CDCl}_3$ ):  $\delta$  20.6–20.9 ( $\text{CH}_3$ ), 61.6 (C-6'), 62.8 (C-6), 68.0 (C-4'), 68.6 (C-5'), 69.3 (C-3'), 70.0 (C-2'), 71.9 (C-2), 72.4 (C-5), 72.7 (C-4), 75.2 (C-3), 76.7 (C≡CH), 83.0 (C≡CH), 95.7 (C-1'), 98.0 (C-1), 116.8, 117.0, 133.6, 156.8 (Ar), 169.4–170.5 (CO). HRMS: Calcd. for  $\text{C}_{34}\text{H}_{41}\text{O}_{18}$  ( $\text{M}^+ + 1$ ): 737.2293, found: 737.2292. Anal. Calcd. for  $\text{C}_{34}\text{H}_{40}\text{O}_{18}$ : C, 55.43; H, 5.47. Found: C, 55.36; H, 5.45.

**Preparation of 4-ethynylphenoxy 2,3,4,6-tetra-*O*-acetyl- $\alpha$ -D-galactopyranoside (HL10).**

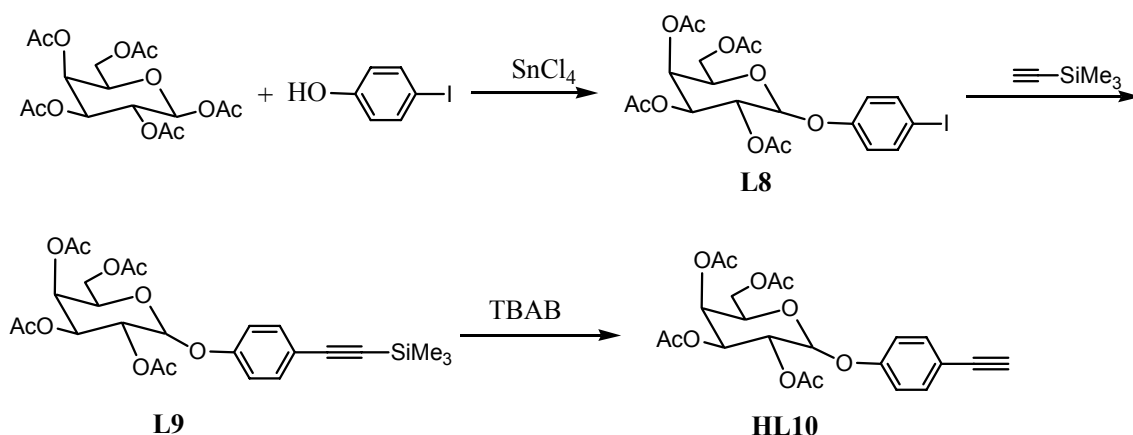

**(a) 4-Iodophenyl 2,3,4,6-tetra-*O*-acetyl- $\alpha$ -D-galactopyranoside (L8).** To a solution of  $\beta$ -D-galactopyranoside pentaacetate (4 g, 10.26 mmol) and 4-iodophenol (3.16 g, 14.4 mmol) in dry dichloromethane (20 mL) was added  $\text{SnCl}_4$  (3.6 mL, 30.8 mmol). The reaction was stirred at room temperature. After completion of the reaction (monitored by TLC, petroleum/ethyl acetate = 2:1), the mixture was neutralised with aqueous  $\text{NaHCO}_3$  and diluted with dichloromethane (20 mL). The solution was filtered through Celite and the filtered cake was washed with dichloromethane (20 mL). The organic phase was washed with brine, dried over  $\text{Na}_2\text{SO}_4$ , and evaporated. Flash column chromatography of the residue (hexane/ethyl acetate = 3:1  $\rightarrow$  2:1) afforded the  $\alpha$ -isomer of **L8**: (1.8 g, 32%). Mp 166–168  $^\circ\text{C}$ ,  $[\alpha]_{\text{D}} = +179.2$  ( $c = 1.0$ ,  $\text{CHCl}_3$ ). IR ( $\text{cm}^{-1}$ , KBr): 2966 ( $\nu_{\text{C-H}}$ ), 1749 ( $\nu_{\text{C=O}}$ ).  $^1\text{H}$  NMR (300 MHz,  $\text{CDCl}_3$ ):  $\delta$  1.95 (s, 3H), 2.03 (s, 3H), 2.07 (s, 3H), 2.17 (s, 3H) ( $\text{OCOCH}_3$ ), 4.03–4.14 (m, 2H, H-6), 4.29 (t, 1H,  $J_{5,6a} = J_{5,6b} = 6.0$  Hz, H-5), 5.27 (dd,  $J_{3,2} = 10.0$  Hz,  $J_{3,4} = 3.6$  Hz, H-3), 5.52–5.57 (m, 2H, H-2, H-4), 5.73 (d, 1H,  $J_{1,2} = 3.6$  Hz, H-1), 6.84 (d, 2H,  $J = 9.0$  Hz, ArH), 7.6 (d, 2H,  $J = 9.0$  Hz, ArH).  $^{13}\text{C}$  NMR (125 MHz,  $\text{CDCl}_3$ ):  $\delta$  20.6–20.7 ( $\text{CH}_3$ ), 61.4 (C-6), 67.3 (C-5), 67.4 (C-2), 67.7 (C-3), 67.8 (C-4), 94.9 (C-1), 85.8, 119.0, 138.5, 156.1 (Ar), 170.0, 170.1, 170.3, 170.4 (CO). HRMS (EI): Calcd. for  $\text{C}_{20}\text{H}_{23}\text{IO}_{10}$  ( $\text{M}^+$ ): 550.0336, found: 550.0336. Anal. Calcd. for  $\text{C}_{20}\text{H}_{23}\text{IO}_{10}$ : C, 43.65; H, 4.21. Found: C, 43.50; H, 4.19.

**(b) 4-[(Trimethylsilyl)ethynyl]phenoxy 2,3,4,6-tetra-*O*-acetyl- $\alpha$ -D-glucopyranoside (L9).** **L8** (1.30 g, 2.35 mmol) was dissolved in dry THF followed by addition of palladium acetate (29 mg,  $12.9 \times 10^{-5}$  mol), copper(I) iodide (20 mg,  $10.5 \times 10^{-5}$  mol) and triphenylphosphine (48.7 mg,  $1.8 \times 10^{-3}$  mol). The resulting solution was degassed with  $\text{N}_2$  for 30 min and (trimethylsilyl)acetylene

(0.36 mL, 2.53 mmol) was added. The mixture was stirred overnight at room temperature and filtered. The filtrate was evaporated and the residue was purified by chromatography (hexane/ethyl acetate = 2:1) to afford **L9**: (1.13 g, 92%). Mp 78–80 °C,  $[\alpha]_D^{25} = +202.8$  ( $c = 1.0$ ,  $\text{CHCl}_3$ ). IR ( $\text{cm}^{-1}$ , KBr): 2961 ( $\nu_{\text{C-H}}$ ), 2157 ( $\nu_{\text{C}\equiv\text{C}}$ ), 1751 ( $\nu_{\text{C=O}}$ ).  $^1\text{H}$  NMR (400 MHz,  $\text{CDCl}_3$ ):  $\delta$  0.25 (s, 9H,  $\text{SiMe}_3$ ), 1.95 (s, 3H), 2.03 (s, 3H), 2.07 (s, 3H), 2.17 (s, 3H) ( $\text{OCOCH}_3$ ), 4.02–4.13 (m, 2H, H-6), 4.30 (br t, 1H,  $J = 6.8$  Hz, H-5), 5.28 (dd,  $J_{3,4} = 3.6$  Hz,  $J_{3,2} = 10.0$  Hz, H-3), 5.51–5.57 (m, 2H, H-2, H-4), 5.77 (d, 1H,  $J_{1,2} = 3.6$  Hz, H-1), 6.98 (d, 2H,  $J = 8.8$  Hz, ArH), 7.40 (d, 2H, ArH).  $^{13}\text{C}$  NMR (125 MHz,  $\text{CDCl}_3$ ):  $\delta$  20.6–20.7 ( $\text{CH}_3$ ), 61.5 (C-6), 67.3 (C-5), 67.4 (C-2), 67.7 (C-3), 67.8 (C-4), 93.5 ( $\text{C}\equiv\text{C-SiMe}_3$ ), 94.7 (C-1), 104.5 ( $\text{C}\equiv\text{C-SiMe}_3$ ), 116.6, 117.8, 133.5, 156.2 (Ar), 170.0, 170.2, 170.3, 170.4 (CO). HRMS (EI): Calcd. for  $\text{C}_{25}\text{H}_{32}\text{O}_{10}\text{Si}$  ( $\text{M}^+$ ): 520.1765, found: 520.1764. Anal. Calcd. for  $\text{C}_{25}\text{H}_{32}\text{O}_{10}\text{Si}$ : C, 57.68; H, 6.20. Found: C, 57.64; H, 6.22.

**(c) 4-Ethynylphenoxy 2,3,4,6-tetra-O-acetyl- $\alpha$ -D-galactopyranoside (HL10).** **L9** (1.10 g, 2.11 mmol) was dissolved in dry dichloromethane (20 mL) and degassed for 10 min. Tetrabutylammonium fluoride (2.60 mL, 2.60 mmol) was added. The mixture was stirred at room temperature. On reaction completion (monitored by TLC, hexane/ethyl acetate = 1:1), the mixture was washed with brine, dried over  $\text{Na}_2\text{SO}_4$ , and evaporated. Flash column chromatography (hexane:ethyl acetate, 2:1) of the residue afforded **HL10**: (0.64 g, 67%). Mp 179–181 °C,  $[\alpha]_D^{25} = +215.0$  ( $c = 1.0$ ,  $\text{CHCl}_3$ ). IR ( $\text{cm}^{-1}$ , KBr): 3286 ( $\nu_{\text{C}\equiv\text{CH}}$ ), 2958 ( $\nu_{\text{C-H}}$ ), 2106 ( $\nu_{\text{C}\equiv\text{C}}$ ), 1750 ( $\nu_{\text{C=O}}$ ).  $^1\text{H}$  NMR (400 MHz,  $\text{CDCl}_3$ ):  $\delta$  1.94 (s, 3H), 2.03 (s, 3H), 2.07 (s, 3H), 2.17 (s, 3H) ( $\text{OCOCH}_3$ ), 3.03 (s, 1H,  $\text{C}\equiv\text{CH}$ ), 4.03–4.14 (m, 2H, H-6), 4.30 (br t, 1H,  $J = 6.8$  Hz, H-5), 5.29 (dd, 1H,  $J_{3,4} = 3.6$  Hz,  $J_{3,2} = 10.0$  Hz, H-3), 5.52–5.58 (m, 2H, H-2, H-4), 5.78 (d, 1H,  $J_{1,2} = 3.6$  Hz, H-1), 7.01 (d, 2H,  $J = 8.8$  Hz, ArH), 7.43 (d, 2H,  $J = 8.8$  Hz, ArH).  $^{13}\text{C}$  NMR (100 MHz,  $\text{CDCl}_3$ ):  $\delta$  20.7–20.8 ( $\text{CH}_3$ ), 61.6 (C-6), 67.5 (C-5), 67.6 (C-2), 67.8 (C-3), 67.9 (C-4), 76.7 ( $\text{C}\equiv\text{CH}$ ), 83.2 ( $\text{C}\equiv\text{CH}$ ), 94.9 (C-1), 116.8, 116.9, 133.8, 156.6 (Ar), 170.1–170.5 (CO). HRMS (EI): Calcd. for  $\text{C}_{22}\text{H}_{24}\text{O}_{10}$  ( $\text{M}^+$ ): 448.1370, found: 448.1369. Anal. Calcd. for  $\text{C}_{22}\text{H}_{24}\text{O}_{10}$ : C, 58.93; H, 5.39. Found: C, 58.86; H, 5.41.

**Preparation of platinum(II) complexes 1–5.** To a solution of  $[\text{Pt}(\text{tBu}_3\text{terpy})\text{Cl}](\text{CF}_3\text{SO}_3)$  (0.11 mmol) in  $\text{CH}_2\text{Cl}_2$  (10 mL) were added **HL3**, **HL4**, **HL5**, **HL7** or **HL10** (0.17 mmol), CuI and anhydrous triethylamine (0.5 mL). The mixture was stirred at room temperature for 12 h under an argon atmosphere, and was then filtered. The solvent was evaporated to dryness. The product was isolated by column chromatography on silica gel using dichloromethane-methanol (10:1 v/v) as eluent.

**$[\text{Pt}(\text{tBu}_3\text{terpy})(\text{L3})](\text{CF}_3\text{SO}_3)$  (1).** Yield: 94 mg (72%, orange solid). IR ( $\text{cm}^{-1}$ , KBr): 2122 ( $\nu_{\text{C}\equiv\text{C}}$ ).  $^1\text{H}$  NMR (400 MHz,  $\text{CDCl}_3$ ):  $\delta$  1.49 (s, 18H), 1.58 (s, 9H), 2.05 (s, 3H), 2.06 (s, 3H), 2.08 (s, 3H), 2.10 (s, 3H), 3.87–3.92 (m, 1H), 4.19 (dd, 1H,  $J = 2.4$  Hz,  $J = 12.0$  Hz), 4.31 (dd, 1H,  $J = 5.2$  Hz,  $J = 12.0$  Hz), 5.10 (d, 1H,  $J = 8.0$  Hz), 5.19 (t, 1H,  $J = 9.6$  Hz), 5.26–5.34 (m, 2H), 6.95 (d, 2H,  $J = 8.0$  Hz), 7.44 (d, 2H,  $J = 8.0$  Hz), 7.61 (d, 2H,  $J = 6.0$  Hz), 8.38 (s, 2H), 8.45 (s, 2H), 9.14 (d, 2H,  $J = 6.0$  Hz). FAB-MS:  $m/z$  1043 ( $\text{M}^+$ ). Anal. Calcd. for  $\text{C}_{50}\text{H}_{58}\text{F}_3\text{N}_3\text{O}_{13}\text{PtS}$ : C, 50.33; H, 4.90; N, 3.52. Found: C, 50.30; H, 4.91; N, 3.61.

**$[\text{Pt}(\text{tBu}_3\text{terpy})(\text{L4})](\text{CF}_3\text{SO}_3)$  (2).** Yield: 86 mg (69%, yellow solid). IR ( $\text{cm}^{-1}$ , KBr): 2130 ( $\nu_{\text{C}\equiv\text{C}}$ ).  $^1\text{H}$  NMR (300 MHz,  $\text{CDCl}_3$ ):  $\delta$  1.48 (s, 18H), 1.56 (s, 9H), 1.94 (s, 3H), 2.03 (s, 3H), 2.04 (s, 3H), 2.16 (s, 3H), 3.82–3.94 (m, 2H), 4.12 (dd, 1H,  $J = 2.4$  Hz,  $J = 12.0$  Hz), 4.29 (dd, 1H,  $J = 4.5$  Hz,  $J = 12.0$  Hz), 4.68 (d, 1H,  $J = 15.0$  Hz), 4.80 (d, 1H,  $J = 15.0$  Hz), 5.09 (t, 1H,  $J = J = 9.6$  Hz), 5.17 (d, 1H,  $J = 8.4$  Hz), 5.45 (t, 1H,  $J = J = 9.6$  Hz), 6.56 (d, 1H,  $J = 8.7$  Hz), 7.74 (d, 2H,  $J = 6.0$  Hz), 8.26 (s, 2H), 8.33 (s, 2H), 9.08 (d, 2H,  $J = 6.0$  Hz). FAB-MS:  $m/z$  980 ( $\text{M}^+$ ). Anal. Calcd. for  $\text{C}_{45}\text{H}_{57}\text{F}_3\text{N}_4\text{O}_{12}\text{PtS}$ : C, 47.83; H, 5.08; N, 4.96. Found: C, 47.86; H, 5.08; N, 4.99.

**$[\text{Pt}(\text{tBu}_3\text{terpy})(\text{L5})](\text{CF}_3\text{SO}_3)$  (3).** Yield: 103 mg (66%, yellow solid). IR ( $\text{cm}^{-1}$ , KBr): 2135 ( $\nu_{\text{C}\equiv\text{C}}$ ).  $^1\text{H}$  NMR (300 MHz,  $\text{CDCl}_3$ ):  $\delta$  1.51 (s, 18H), 1.58 (s, 9H), 1.99 (s, 3H), 2.02 (s, 3H), 2.04 (s,

3H), 2.06 (s, 3H), 2.07 (s, 3H), 2.11 (s, 3H), 2.16 (s, 3H), 3.78–3.83 (m, 1H), 3.93–3.98 (m, 1H), 4.03–4.14 (m, 2H), 4.22–4.29 (m, 2H), 4.52 (dd, 1H,  $J = 3.0$  Hz,  $J = 12.0$  Hz), 4.74 (s, 2H), 4.87 (dd, 1H,  $J = 4.2$  Hz,  $J = 10.0$  Hz), 4.96–5.10 (m, 2H), 5.14 (d, 1H,  $J = 8.0$  Hz), 5.32–5.39 (m, 2H), 5.47 (d, 1H,  $J = 4.0$  Hz), 7.76 (d, 2H,  $J = 6.0$  Hz), 8.38 (s, 2H), 8.45 (s, 2H), 9.07 (d, 2H,  $J = 6.0$  Hz). FAB-MS:  $m/z$  1271 ( $M^+$ ). Anal. Calcd. for  $C_{57}H_{72}F_3N_3O_{21}PtS$ : C, 48.23; H, 5.11; N, 2.96. Found: C, 48.27; H, 5.12; N, 2.98.

**[Pt(<sup>t</sup>Bu<sub>3</sub>terpy)(L7)](CF<sub>3</sub>SO<sub>3</sub>) (4).** Yield: 111 mg (71%, orange solid). IR (cm<sup>-1</sup>, KBr): 2116 ( $\nu_{C\equiv C}$ ). <sup>1</sup>H NMR (300 MHz, CDCl<sub>3</sub>):  $\delta$  1.50 (s, 18H), 1.60 (s, 9H), 2.02 (s, 3H), 2.04 (s, 3H), 2.05 (s, 3H), 2.06 (s, 3H), 2.07 (s, 3H), 2.11 (s, 3H), 2.12 (s, 3H), 3.88–3.92 (m, 1H), 3.97–4.01 (m, 1H), 4.05–4.16 (m, 2H), 4.23–4.32 (m, 2H), 4.52 (dd, 1H,  $J = 3.0$  Hz,  $J = 12.0$  Hz), 4.87 (dd, 1H,  $J = 4.2$  Hz,  $J = 10.5$  Hz), 5.07 (t, 1H,  $J = 10.0$  Hz), 5.11–5.17 (m, 2H), 5.34 (t, 1H,  $J = 8.4$  Hz), 5.39 (t, 1H,  $J = 9.0$  Hz), 5.46 (d, 1H,  $J = 4.0$  Hz), 6.94 (d, 2H,  $J = 9.0$  Hz), 7.44 (d, 2H,  $J = 9.0$  Hz), 7.81 (d, 2H,  $J = 6.0$  Hz), 8.39 (s, 2H), 8.46 (s, 2H), 9.15 (d, 2H,  $J = 6.0$  Hz). FAB-MS:  $m/z$  1331 ( $M^+$ ). Anal. Calcd. for  $C_{62}H_{74}F_3N_3O_{21}PtS$ : C, 50.27; H, 5.03; N, 2.84. Found: C, 50.28; H, 5.06; N, 2.92.

**[Pt(<sup>t</sup>Bu<sub>3</sub>terpy)(L10)](CF<sub>3</sub>SO<sub>3</sub>) (5).** Yield: 98 mg (75%, orange solid). IR (cm<sup>-1</sup>, KBr): 2122 ( $\nu_{C\equiv C}$ ). <sup>1</sup>H NMR (400 MHz, CDCl<sub>3</sub>):  $\delta$  1.50 (s, 18H), 1.58 (s, 9H), 1.99 (s, 3H), 2.05 (s, 3H), 2.10 (s, 3H), 2.17 (s, 3H), 4.07–4.16 (m, 2H), 4.36 (br t, 1H,  $J = 6.8$  Hz), 5.29 (dd,  $J = 12.0$  Hz,  $J = 3.6$  Hz), 5.54–5.61 (m, 2H), 5.80 (d, 1H,  $J = 3.6$  Hz), 7.03 (d, 2H,  $J = 8.0$  Hz), 7.47 (d, 2H,  $J = 8.0$  Hz), 7.61 (d, 2H,  $J = 6.8$  Hz), 8.37 (s, 2H), 8.44 (s, 2H), 9.14 (d, 2H,  $J = 6.8$  Hz). FAB-MS:  $m/z$  1043 ( $M^+$ ). Anal. Calcd. for  $C_{50}H_{58}F_3N_3O_{13}PtS$ : C, 50.33; H, 4.90; N, 3.52. Found: C, 50.40; H, 4.86; N, 3.59.

**Preparation of platinum(II) complexes 6 and 7.** To a solution of [Pt(terpy)Cl](CF<sub>3</sub>SO<sub>3</sub>) (68 mg, 0.11 mmol) in CH<sub>2</sub>Cl<sub>2</sub> (60 mL) were added **HL4** or **HL10** (0.17 mmol), CuI and anhydrous triethylamine (0.5 mL). The mixture was stirred at room temperature for 24 h under an argon atmosphere, and was then filtered. The volume of the filtrate was reduced. The product precipitated was collected by filtration, washed with water and diethyl ether, and recrystallised from methanol.

**[Pt(terpy)(L4)](CF<sub>3</sub>SO<sub>3</sub>) (6).** Yield: 59 mg (56%, brick-red solid). IR (cm<sup>-1</sup>, KBr): 2136 ( $\nu_{C\equiv C}$ ). <sup>1</sup>H NMR (400 MHz, CD<sub>3</sub>SOCD<sub>3</sub>):  $\delta$  1.93 (s, 3H), 1.95 (s, 3H), 1.97 (s, 3H), 2.01 (s, 3H), 3.76 (m, 1H), 3.92 (s, 1H), 4.22 (m, 1H), 4.40 (m, 1H), 4.51–4.60 (m, 2H), 4.93 (m, 2H), 5.24 (m, 1H), 7.86 (m, 1H), 8.09 (d, 2H,  $J = 7.0$  Hz), 8.23–8.28 (m, 7H), 8.36 (s, 2H,  $J = 7.0$  Hz). FAB-MS:  $m/z$  812 ( $M^+$ ). Anal. Calcd. for  $C_{33}H_{33}F_3N_4O_{12}PtS$ : C, 41.21; H, 3.46; N, 5.83; Found: C, 40.95; H, 3.60; N, 5.96.

**[Pt(terpy)(L10)](CF<sub>3</sub>SO<sub>3</sub>) (7).** Yield: 64 mg (57%, brick-red solid). IR (cm<sup>-1</sup>, KBr): 2116 ( $\nu_{C\equiv C}$ ). <sup>1</sup>H NMR (400 MHz, CD<sub>3</sub>SOCD<sub>3</sub>):  $\delta$  1.92 (s, 3H), 1.98 (s, 3H), 2.08 (s, 3H), 2.15 (s, 3H), 4.00–4.07 (m, 2H), 4.40–4.42 (m, 1H), 5.17–5.21 (m, 1H), 5.42–5.46 (m, 2H), 5.86 (br, 1H), 7.09 (d, 2H,  $J = 8.0$  Hz), 7.42 (d, 2H,  $J = 8.0$  Hz), 7.82–7.86 (m, 2H), 8.42–8.91 (m, 9H). FAB-MS:  $m/z$  875 ( $M^+$ ). Anal. Calcd. for  $C_{38}H_{34}F_3N_3O_{13}PtS$ : C, 44.53; H, 3.34; N, 4.10. Found: C, 44.83; H, 3.41, N, 4.29.

## References

- 1 J. Sambrook, E. F. Fritsch, T. E. Maniatis, *Molecular Cloning, A Laboratory Manual*, 2nd Ed., 1989, E.3 and E.10.
- 2 G. Felsenfeld, S. Z. Hirschman, *J. Mol. Biol.*, 1965, **13**, 407.
- 3 M. L. Wolfrom, A. Thompson, *Methods in Carbohydr. Chem.*, 1963, 2, 211.
- 4 E. Fischer, G. Zemplén, *Ber.*, 1910, **43**, 2534.
- 5 (a) H. K. Yip, L. K. Cheng, K. K. Cheung, C.-M. Che, *J. Chem. Soc., Dalton Trans.*, 1993, 2933; (b) S.-W. Lai, M. C. W. Chan, K.-K. Cheung, C.-M. Che, *Inorg. Chem.*, 1999, **38**, 4262.

Supplementary Material (ESI) for Chemical Communications

This journal is © The Royal Society of Chemistry 2005

- 6 S. J. Busch, R. L. Barnhart, G. A. Martin, M. A. Flanagan, R. L. Jackson, *J. Biol. Chem.*, 1990, **265**, 22474.
- 7 C. V. Kumar, E. H. Asuncion, *J. Am. Chem. Soc.*, 1993, **115**, 8547.
- 8 P. Hegde, R. Qi, K. Abernathy, C. Gay, *Biotechniques*, 2000, **29**, 548.
- 9 G. B. Giovenzana, L. Lay, D. Monti, G. Palmisano, L. Panza, *Tetrahedron*, 1999, **53**, 14123.
- 10 Y. S. Shin, M. J. Han, S.-K. Hong, *Chem. Mater.*, 2000, **12**, 1076.

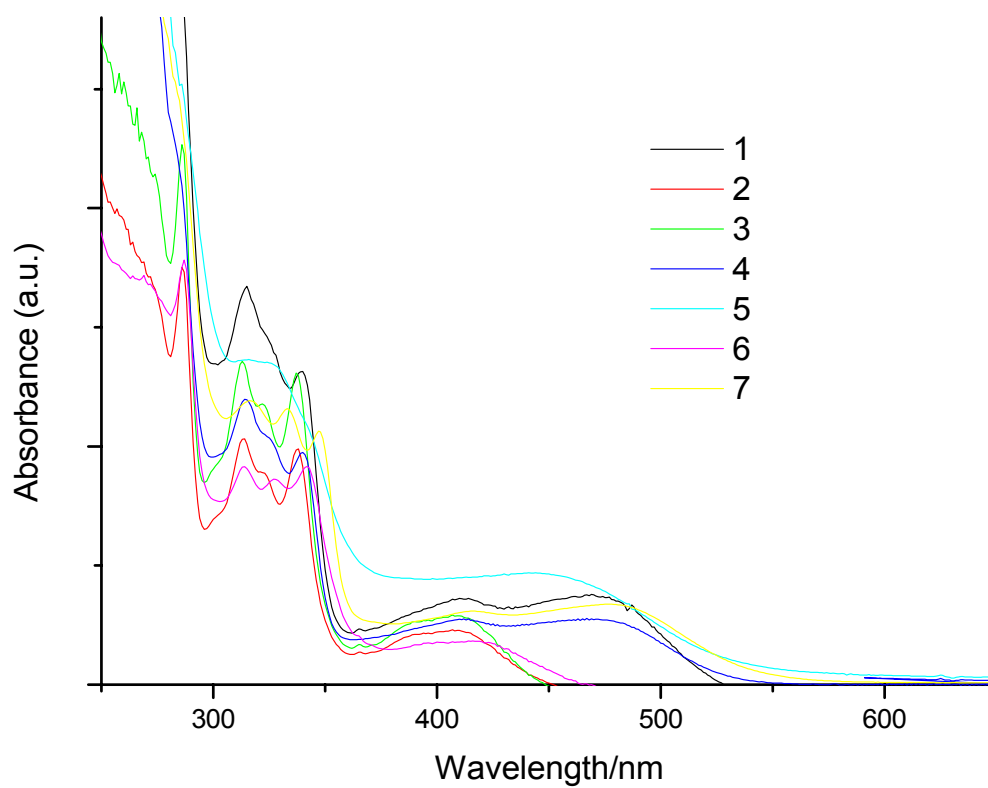

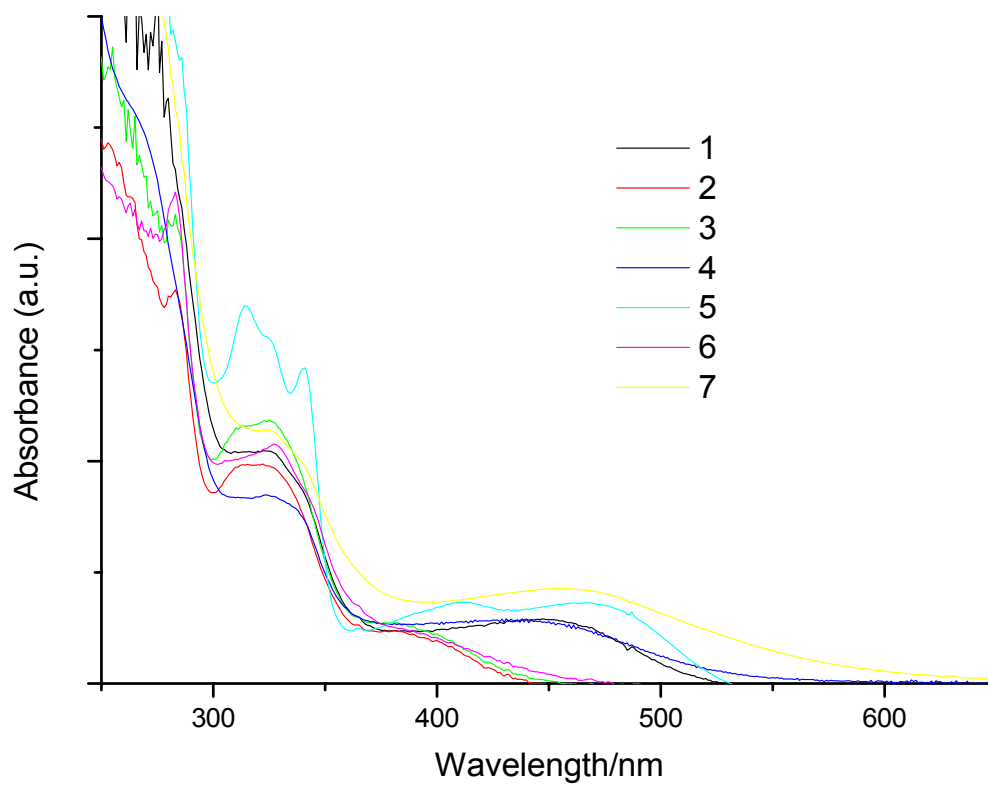

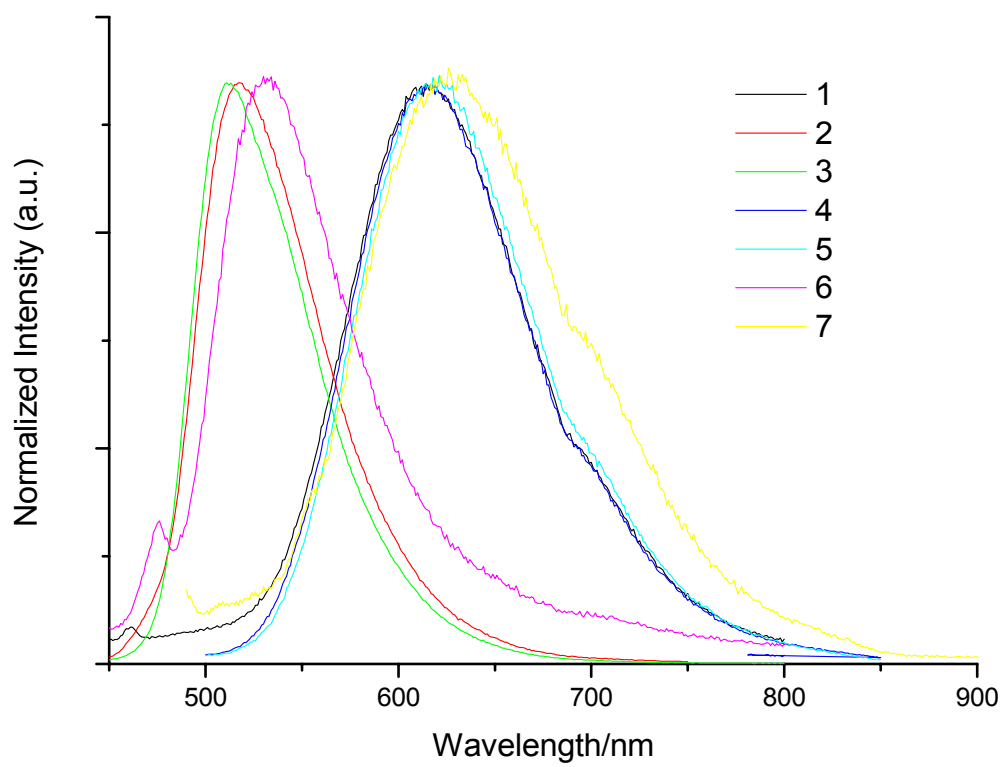

**Fig. S4** Emission spectra of **1** in solid state and CH<sub>2</sub>Cl<sub>2</sub> at 298 K.

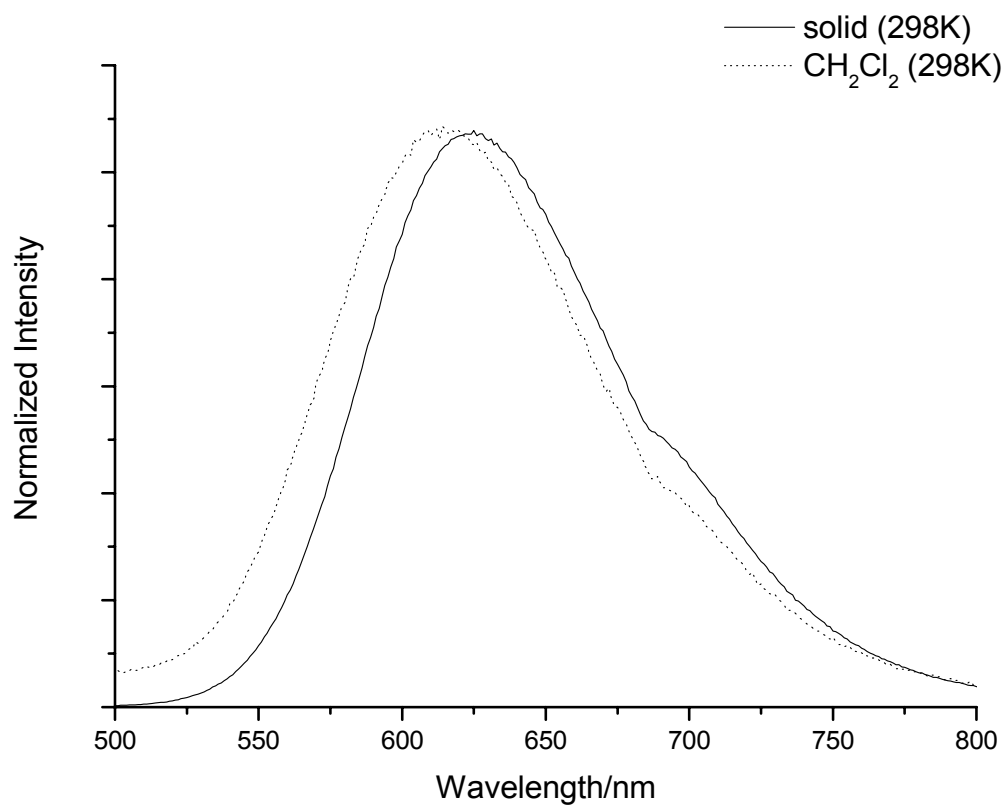

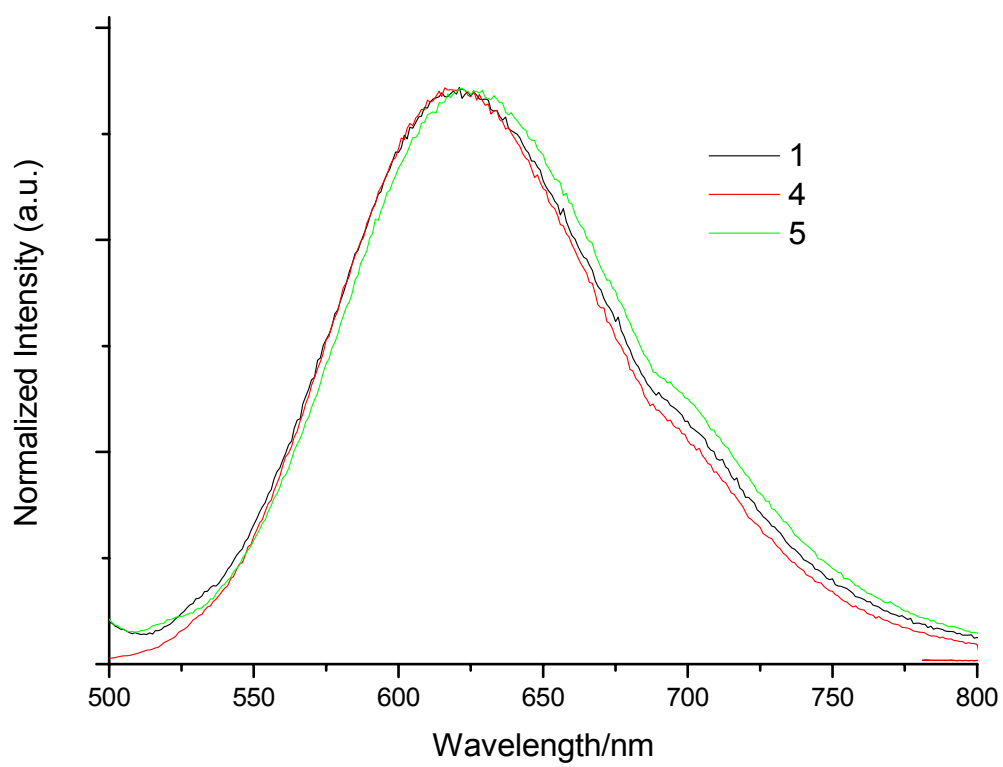

**Fig. S6** Inhibition of restriction endonuclease *ApaI* cutting sites by various small molecules. Lane A is size marker. Lanes B and C are undigested and *ApaI* (1 unit/ $\mu$ L) digestion products of pDR2 DNA (10.7 kbp, 21 nM bp<sup>-1</sup>), respectively.<sup>a</sup> Lanes D–F are the digestion products of pDR2 DNA in the presence of DNA interacting molecules: ethidium bromide (4  $\mu$ M) (Lane D), Hoechst 33342 (200  $\mu$ M) (Lane E), cisplatin (200  $\mu$ M) (Lane F).<sup>b</sup> Lane G is the digestion products of pDR2 DNA in the presence of **1** at 4  $\mu$ M (Lane G).<sup>c</sup>

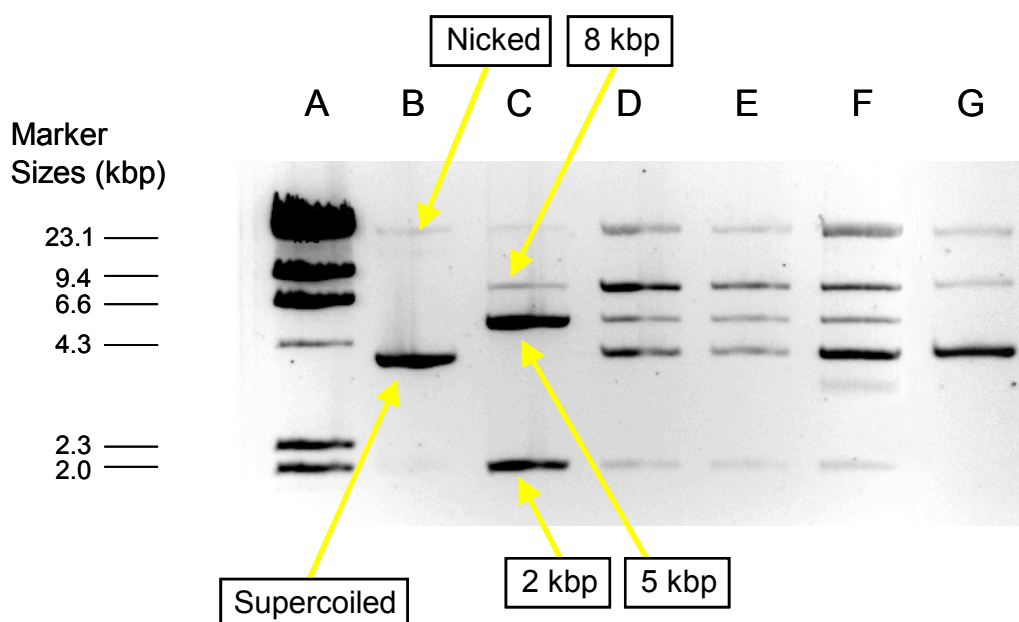

<sup>a</sup> Two bands corresponding to the supercoiled and nicked DNA were observed for the undigested DNA (Lane B). After *ApaI* digestion of pDR2, three bands corresponding to DNA fragments with 8, 5 and 2 kbp were obtained and resolved by agarose gel electrophoresis (Lane C).

<sup>b</sup> In the presence of the classical intercalator – ethidium bromide (4  $\mu$ M), the minor groove binder – Hoechst 33342 (200  $\mu$ M), or the intrastrand crosslinker – cisplatin (200  $\mu$ M), DNA digestion was incomplete and bands attributed to the whole plasmid plus fragments were observed (Lanes D–F).

<sup>c</sup> Because complex **1** binds to DNA, treatment of pDR2 and *ApaI* with **1** at concentration 4  $\mu$ M in 1 $\times$  SuRE/Cut Buffer A inhibit the *ApaI* digestion and bands attributed to the whole plasmid plus fragments were observed (Lane G).

**Fig. S7** UV/Vis spectra of **6** (50.0  $\mu$ M) in Tris buffer solution with increasing ratio of [DNA]/[Pt] = 0–1.00 at 20.0 °C.

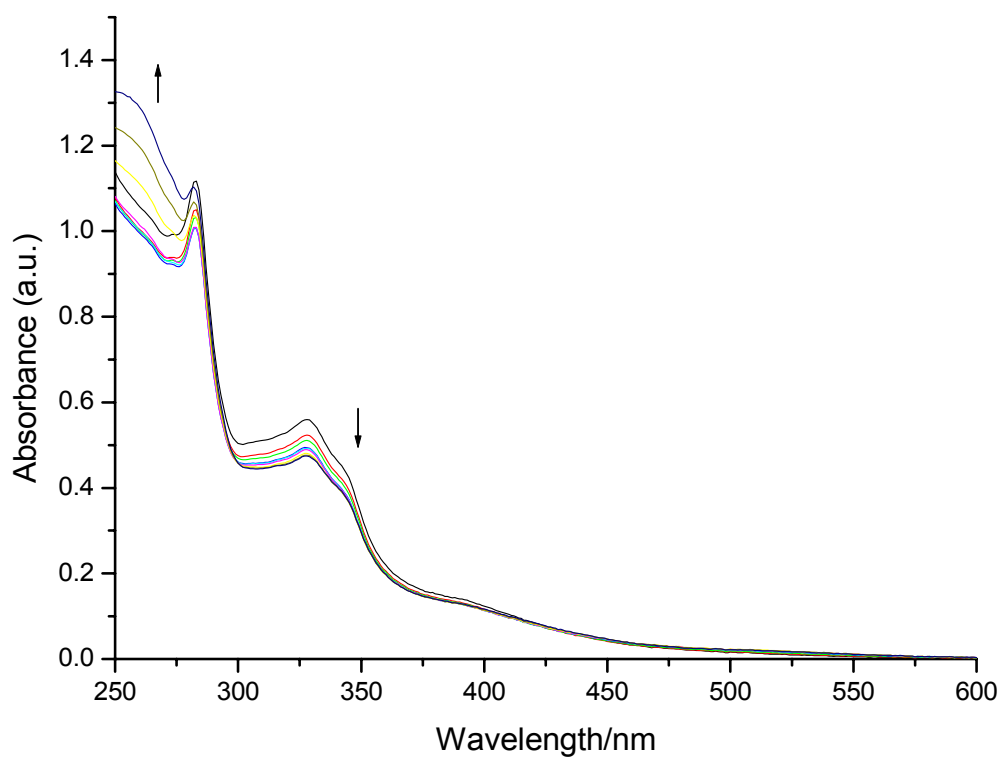

**Fig. S8** UV/Vis spectra of **9** (50.0  $\mu\text{M}$ ) in Tris buffer solution with increasing ratio of  $[\text{DNA}]/[\text{Pt}]$  = 0–2.00 at 20.0  $^{\circ}\text{C}$ .

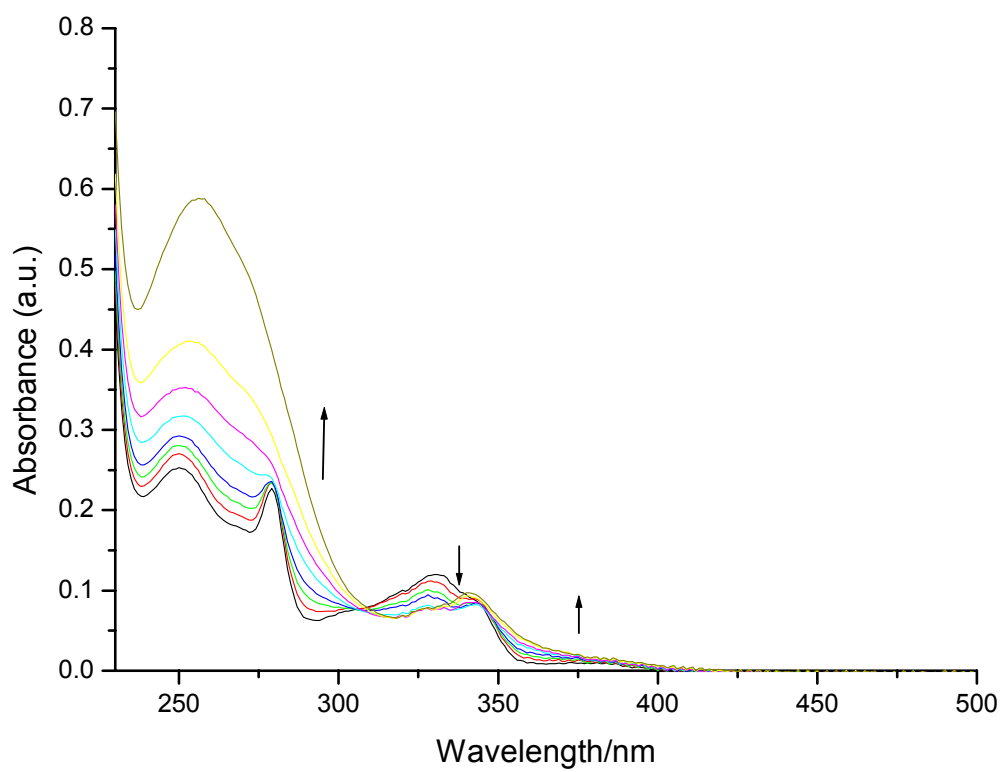

**Fig. S9** Plot of  $D/\Delta\epsilon_{\text{ap}}$  vs.  $D$ . Absorbance was monitored at 325 nm.

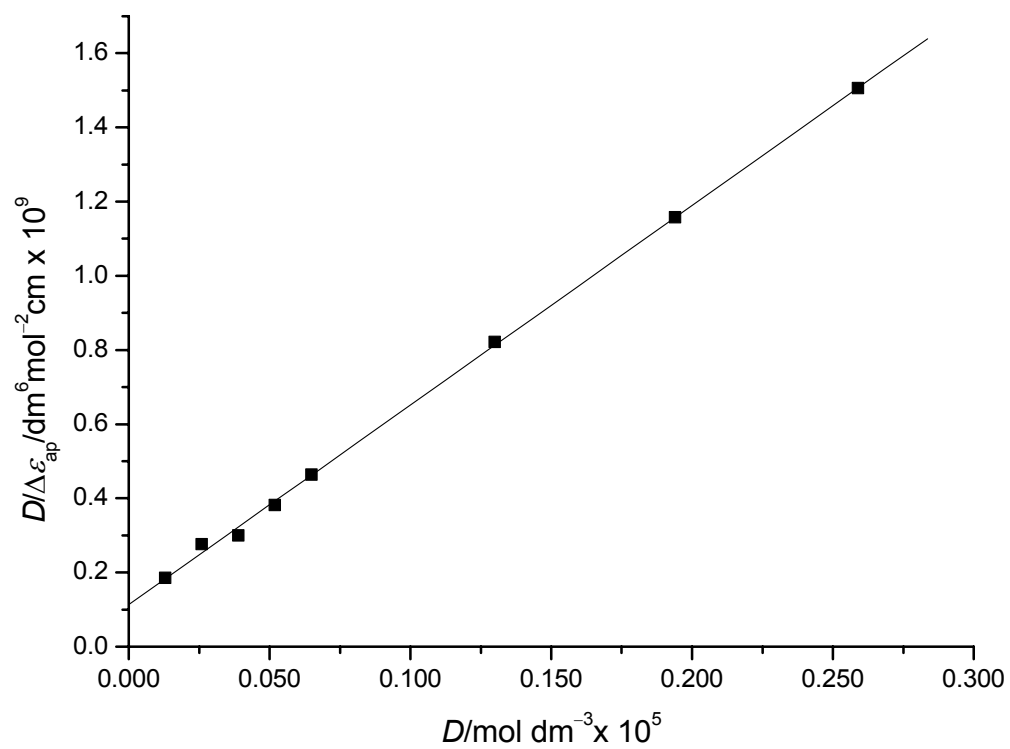

**Fig. S10** Emission spectral traces of **1** (50  $\mu\text{M}$ ) in Tris buffer solution with increasing ratio of  $[\text{DNA}]/[\text{1}] = 0\text{--}5.4$  at 20  $^{\circ}\text{C}$ . Inset: Plot of  $I/I_0$  vs  $[\text{DNA}]/[\text{Pt}]$  for the emission titration study of the **1**–DNA interaction.

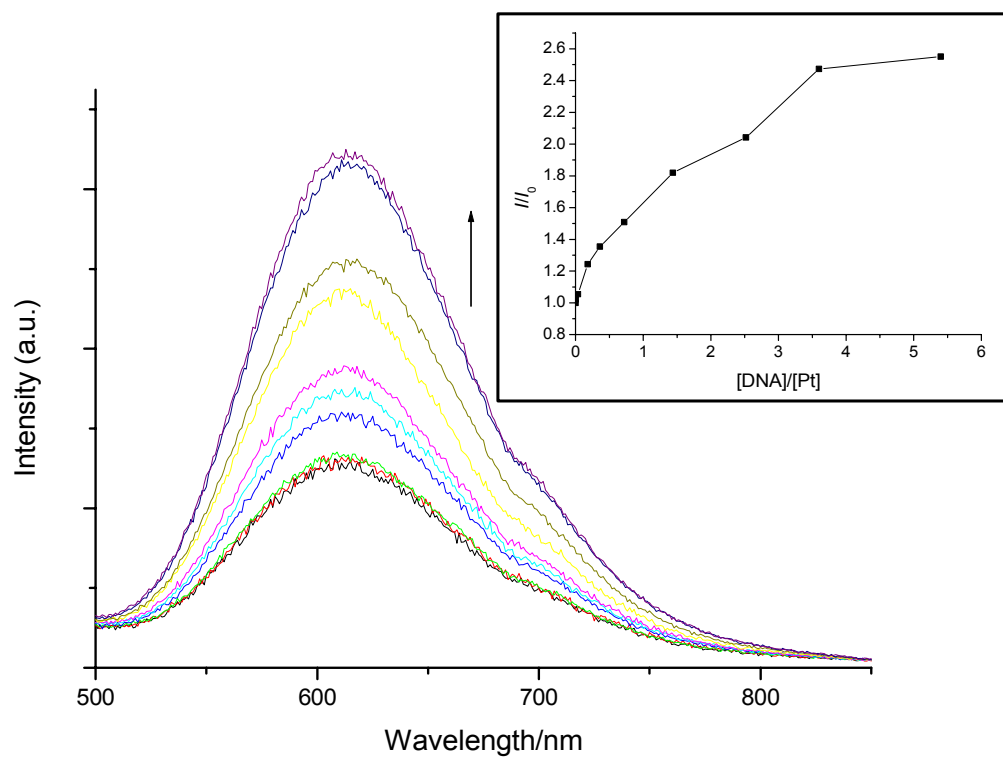

**Fig. S11** Emission spectral traces of **7** (50.0  $\mu\text{M}$ ) in Tris buffer solution with increasing ratio of  $[\text{DNA}]/[\text{Pt}] = 0\text{--}5.1$  at 20.0  $^{\circ}\text{C}$ . Inset: Plot of  $I/I_0$  vs  $[\text{DNA}]/[\text{Pt}]$  for the emission titration study of the **7**–DNA interaction.

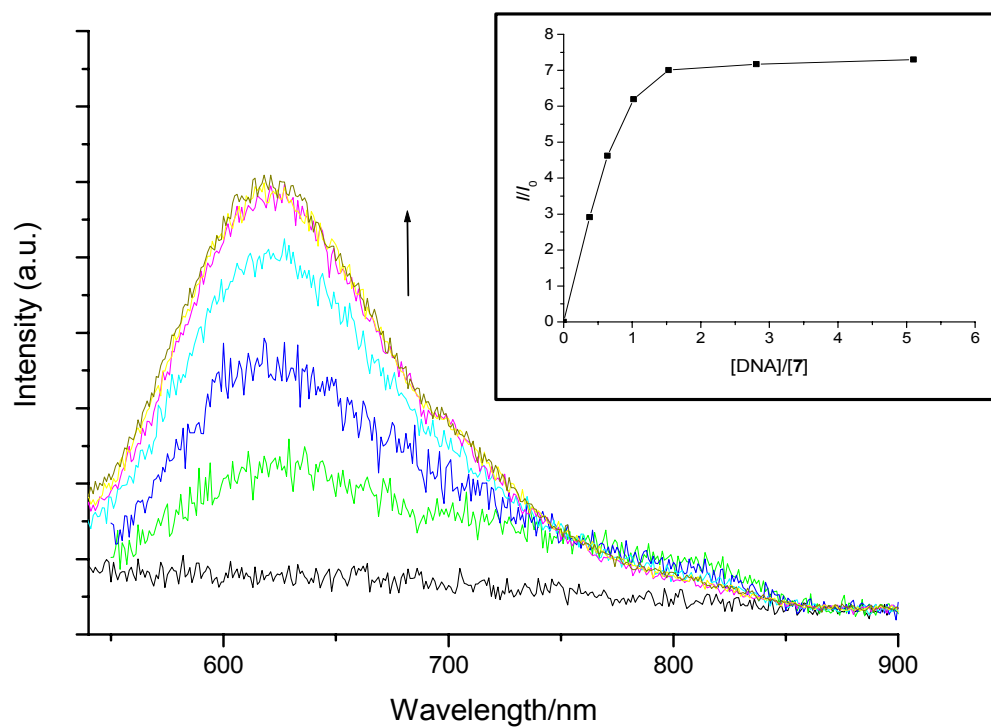

**Fig. S12** FACS analysis of apoptotic NCI-H460 cells by Annexin-V-FLUOS and propidium iodide. (a) single parameter Annexin-V-Fluos (cultivation for 8 h in the presence of **1**), (b) dual parameter (cultivation for 8 h in the absence of **1**), and (c) dual parameter (cultivation for 8 h in the presence of **1**); cluster R1 = living cells, R2 = apoptotic cells, R3 = necrotic cells, and R4 = late apoptotic cells and necrotic cells.

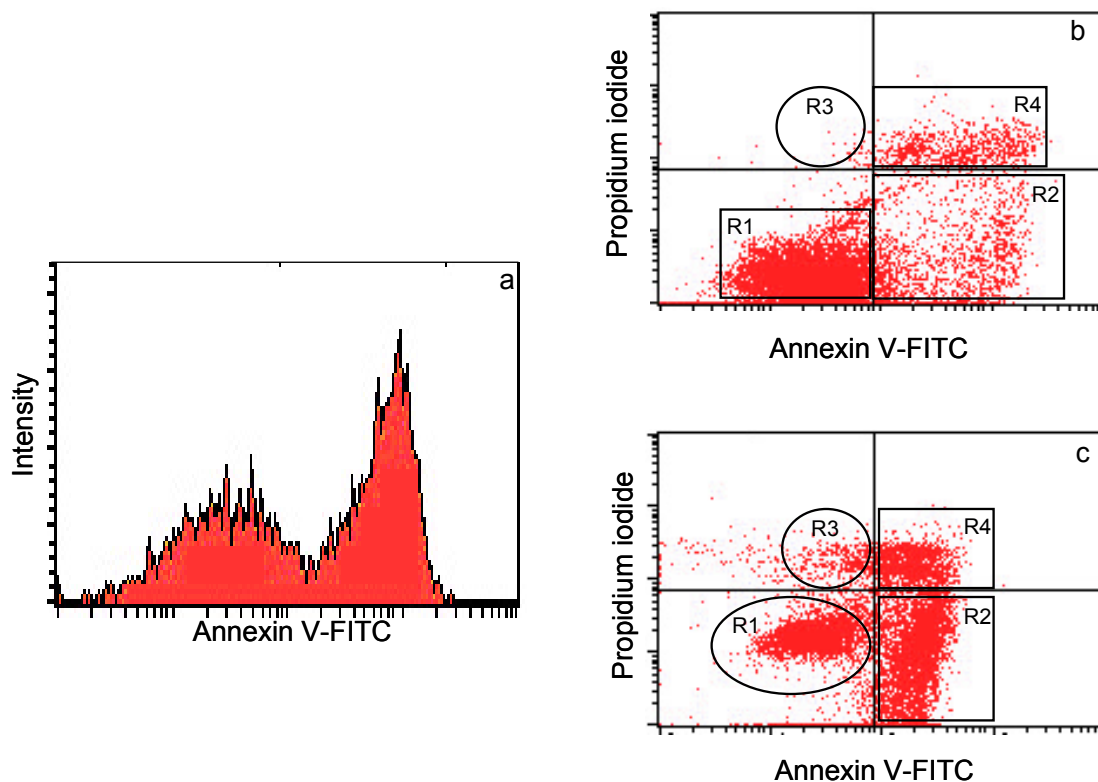

**Fig. S13** Microarray image of a hybridization experiment with Cy3-labelled mRNA from treated by **1** in NCI-H460 cells and Cy5- labelled mRNA from untreated control NCI-H460 cells. The labelled mRNA pools were mixed and hybridised to a 10000 DNA microarray. Spots in green represent mRNAs in a relative higher abundance in the treated sample; spots in red represent mRNAs in a relative higher abundance in the control sample; yellow spots represent equal amounts of mRNA in both samples.

Human chip A  
Cy3: complex **1**  
Cy5: control

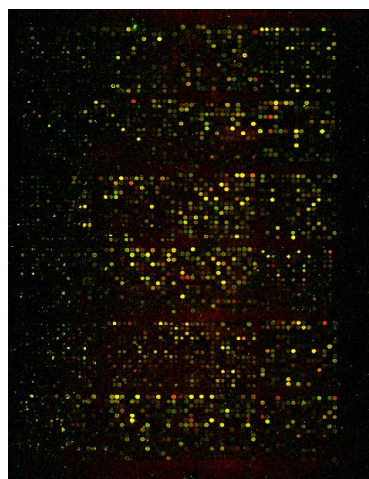

Human chip B  
Cy3: complex **1**  
Cy5: control

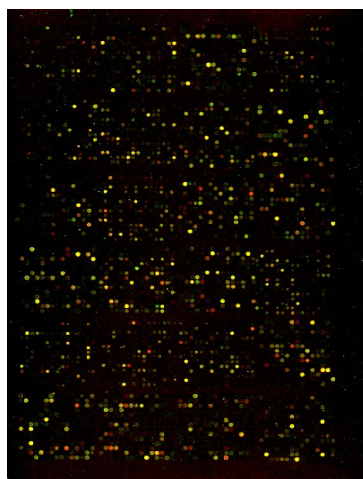

**Table S1** Photophysical data for **1–7**

| Complex  | medium (T/K)                          | $\lambda_{\text{abs}}/\text{nm}$ ( $\epsilon_{\text{max}}/\text{dm}^3 \text{ mol}^{-1} \text{ cm}^{-1}$ ) | $\lambda_{\text{em}}/\text{nm}$ ( $\tau/\mu\text{s}$ ) | $\phi_{\text{em}}$   |
|----------|---------------------------------------|-----------------------------------------------------------------------------------------------------------|--------------------------------------------------------|----------------------|
| <b>1</b> | solid (298)                           |                                                                                                           | 624 (0.17)                                             |                      |
|          | H <sub>2</sub> O (298)                | 326 (104160), 341 (84040), 450 (28720)                                                                    | 619 (0.29)                                             | $3.7 \times 10^{-2}$ |
|          | CH <sub>2</sub> Cl <sub>2</sub> (298) | 314 (16650), 339 (13140), 412 (3710),<br>470 (3770)                                                       | 615 ( $\leq 0.2$ ) <sup>a</sup>                        | $4.4 \times 10^{-2}$ |
|          | CH <sub>3</sub> CN (298)              | 310 (32500), 325 (31100), 338 (31500),<br>403 (8900), 440 (9300)                                          | 619 ( $\leq 0.2$ ) <sup>a</sup>                        | $5.2 \times 10^{-4}$ |
|          | CH <sub>3</sub> OH (298)              | 311 (37100), 325 (34300), 339 (33400),<br>404 (10300), 440 (9744)                                         | 624 (< 0.1)                                            | $4.8 \times 10^{-4}$ |
| <b>2</b> | solid (298)                           |                                                                                                           | 617 (0.30)                                             |                      |
|          | H <sub>2</sub> O (298)                | 318 (9820), 382 (2310)                                                                                    | non-emissive                                           |                      |
|          | CH <sub>2</sub> Cl <sub>2</sub> (298) | 313 (10240), 322 (8880), 338 (9850),<br>409 (2300)                                                        | 515 (0.23)                                             | $1.4 \times 10^{-2}$ |
| <b>3</b> | solid (298)                           |                                                                                                           | 613 (0.16)                                             |                      |
|          | H <sub>2</sub> O (298)                | 312 (11760), 324 (118670), 380 (2730)                                                                     | non-emissive                                           |                      |
|          | CH <sub>2</sub> Cl <sub>2</sub> (298) | 312 (13560), 323 (11690), 337 (13020),<br>411 (2870)                                                      | 513 (0.45)                                             | $5.1 \times 10^{-2}$ |
| <b>4</b> | solid (298)                           |                                                                                                           | 638 (1.58)                                             |                      |
|          | H <sub>2</sub> O (298)                | 324 (12270), 450 (3510)                                                                                   | 621 (0.40)                                             | $1.2 \times 10^{-2}$ |
|          | CH <sub>2</sub> Cl <sub>2</sub> (298) | 316 (19940), 338 (16050), 408 (4970),<br>467 (5080)                                                       | 617 (0.12)                                             | $2.4 \times 10^{-3}$ |
| <b>5</b> | solid (298)                           |                                                                                                           | 632 (0.26)                                             |                      |
|          | H <sub>2</sub> O (298)                | 314 (17011), 324 (15590), 340 (14187),<br>411 (3694), 470 (3549)                                          | 623 (0.27)                                             | $1.4 \times 10^{-2}$ |
|          | CH <sub>2</sub> Cl <sub>2</sub> (298) | 326 (13578), 445 (4584)                                                                                   | 619 (0.21)                                             | $2.4 \times 10^{-2}$ |
| <b>6</b> | solid (298)                           |                                                                                                           | 733 (< 0.1)                                            |                      |
|          | H <sub>2</sub> O (298)                | 328 (10750), 342 (8510), 388 (2390)                                                                       | non-emissive                                           |                      |
|          | CH <sub>2</sub> Cl <sub>2</sub> (298) | 313 (9150), 327 (8670), 342 (9150),<br>417 (1830)                                                         | 532 (0.15)                                             | $1.6 \times 10^{-1}$ |
| <b>7</b> | solid (298)                           |                                                                                                           | 798 (< 0.1)                                            |                      |
|          | H <sub>2</sub> O (298)                | 324 (14000), 455 (5200)                                                                                   | 795 (< 0.1)                                            | $< 1 \times 10^{-4}$ |
|          | CH <sub>2</sub> Cl <sub>2</sub> (298) | 316 (23800), 333 (23100), 348 (21200),<br>417 (6200), 476 (6800)                                          | 626 (< 0.1)                                            | $6.9 \times 10^{-4}$ |

<sup>a</sup> Not single exponential decay.

**Table S2** Summary of DNA binding data for **1–9**

| Complex  | <i>K</i> at 20 °C/mol <sup>-1</sup> dm <sup>3</sup> |
|----------|-----------------------------------------------------|
|          | Double-stranded DNA                                 |
| <b>1</b> | n.d. <sup>a</sup>                                   |
| <b>2</b> | $8.3 \times 10^4$                                   |
| <b>3</b> | $9.2 \times 10^4$                                   |
| <b>4</b> | $1.3 \times 10^6$                                   |
| <b>5</b> | n.d. <sup>a</sup>                                   |
| <b>6</b> | $4.8 \times 10^5$                                   |
| <b>7</b> | $3.7 \times 10^5$                                   |
| <b>8</b> | $6.9 \times 10^5$                                   |
| <b>9</b> | $3.9 \times 10^5$                                   |

<sup>a</sup> Not determined.

**Table S3** Induction/repression of genes involved in diverse processes by **1** in NCI-H460 cells

| Regulation           | Gene Symbol | GenBank   | Molecular Function                                                                                                                                                                             | Biological Process                                                                                                           | Cellular Component      |
|----------------------|-------------|-----------|------------------------------------------------------------------------------------------------------------------------------------------------------------------------------------------------|------------------------------------------------------------------------------------------------------------------------------|-------------------------|
| <b>Transcription</b> |             |           |                                                                                                                                                                                                |                                                                                                                              |                         |
| +                    | DDIT3       | BE410528  | Transcription factor activity, Transcription corepressor activity                                                                                                                              | Cell cycle arrest, Cell growth and/or maintenance Regulation of transcription, DNA-dependent Response to DNA damage stimulus | Nucleus                 |
| +                    | ATF2        | NM_001880 | DNA binding<br>RNA polymerase II transcription factor activity<br>Transcription coactivator activity<br>Zinc ion binding                                                                       | Regulation of transcription, DNA-dependent                                                                                   | Nucleus                 |
| +                    | C20orf104   | AI992137  | Zinc ion binding<br>DNA binding                                                                                                                                                                | Regulation of transcription, DNA-dependent                                                                                   | Nucleus                 |
| +                    | TCEA1       | N41981    | Transcription factor activity<br>General RNA polymerase II transcription factor activity                                                                                                       | Transcription<br>RNA elongation<br>Regulation of transcription from Pol II promoter                                          | Nucleus                 |
| +                    | LRRFIP1     | BG261015  | Transcriptional repressor activity<br>RNA polymerase II transcription factor activity<br>Double-stranded RNA binding                                                                           | Negative regulation of transcription<br>Regulation of transcription from Pol II promoter                                     | Cytoskeleton<br>Nucleus |
| +                    | NCOA3       | NM_006534 | Thyroid hormone receptor binding<br>Transcription coactivator activity<br>Transferase activity<br>Acyltransferase activity<br>Histone acetyltransferase activity<br>Signal transducer activity | Transcription<br>Regulation of transcription, DNA-dependent<br>Signal transduction<br>Transcription                          | Nucleus                 |
| +                    | TGIF        | AL549846  | Transcription corepressor activity<br>Transcription factor activity                                                                                                                            | Development<br>Negative regulation of transcription from Pol II promoter<br>Regulation of transcription,                     | Nucleus                 |

|                             |        |           |                                                                                                                       | DNA-dependent                                                                                                                                                                       |                                                    |
|-----------------------------|--------|-----------|-----------------------------------------------------------------------------------------------------------------------|-------------------------------------------------------------------------------------------------------------------------------------------------------------------------------------|----------------------------------------------------|
| +                           | ELL2   | NM_012081 | RNA polymerase II transcription factor activity                                                                       | RNA elongation from Pol II promoter<br>Regulation of transcription, DNA-dependent                                                                                                   | Nucleus<br>Transcription elongation factor complex |
| +                           | RXRG   | NM_006917 | Steroid binding<br>Retinoid-X receptor activity<br>Steroid hormone receptor activity<br>Transcription factor activity | Regulation of transcription, DNA-dependent                                                                                                                                          | Nucleus                                            |
| +                           | T      | NM_003181 | Transcription factor activity                                                                                         | Mesoderm development<br>Regulation of transcription, DNA-dependent<br>Signal transduction<br>Transcription from Pol II promoter<br>Determination of anterior/posterior axis, embryo | Nucleus                                            |
| –                           | ID1    | AL117381  | Regulation of transcription                                                                                           | Development                                                                                                                                                                         | Nucleus                                            |
| <b>Protein biosynthesis</b> |        |           |                                                                                                                       |                                                                                                                                                                                     |                                                    |
| +                           | GARS   | NM_002047 | Ligase activity<br>ATP binding<br>Glycine-tRNA ligase activity                                                        | Protein biosynthesis<br>Glycyl-tRNA aminoacylation                                                                                                                                  | Soluble fraction<br>Cytoplasm                      |
| +                           | SPS2   | BG674956  | ATP binding<br>Selenide, water dikinase activity<br>Transferase activity                                              | Selenocysteine biosynthesis                                                                                                                                                         | Cellular_component<br>unknown                      |
| +                           | AARS   | D32050    | Alanine-tRNA ligase activity<br>Ligase activity<br>Nucleic acid binding<br>TRNA binding<br>ATP binding                | Alanyl-tRNA aminoacylation<br>Protein biosynthesis<br>TRNA processing                                                                                                               | Cytoplasm<br>Soluble fraction                      |
| +                           | SIAT4A | NM_003033 | Beta-galactoside alpha-2,3-sialyltransferase activity                                                                 | Protein amino acid glycosylation                                                                                                                                                    | Integral to membrane<br>Golgi apparatus            |

Supplementary Material (ESI) for Chemical Communications  
This journal is © The Royal Society of Chemistry 2005

|                       |        |           |                                                                                                                                                                                                                                               |                                                                                      |                                                     |
|-----------------------|--------|-----------|-----------------------------------------------------------------------------------------------------------------------------------------------------------------------------------------------------------------------------------------------|--------------------------------------------------------------------------------------|-----------------------------------------------------|
| +                     | MARS   | NM_004990 | TRNA binding<br>ATP binding<br>Ligase activity<br>Methionine-tRNA<br>ligase activity                                                                                                                                                          | Methionyl-tRNA<br>aminoacylation<br>Protein<br>biosynthesis                          | Soluble<br>fraction<br>Cytoplasm                    |
| –                     | TSFM   | AU122778  | Transcriptional<br>elongation regulator<br>activity<br>Translation<br>elongation factor<br>activity                                                                                                                                           | Protein<br>biosynthesis<br>Translational<br>elongation                               | Mitochondrio<br>n                                   |
| <b>Oxidoreductase</b> |        |           |                                                                                                                                                                                                                                               |                                                                                      |                                                     |
| +                     | PYCR1  | NM_006907 | Pyrroline-5-carboxyla<br>te reductase activity<br>Oxidoreductase<br>activity                                                                                                                                                                  | Proline<br>biosynthesis                                                              | n.d.                                                |
| +                     | SCD    | AF097514  | Iron ion binding<br>Oxidoreductase<br>activity<br>Stearoyl-CoA<br>9-desaturase activity                                                                                                                                                       | Fatty acid<br>biosynthesis                                                           | Endoplasmic<br>reticulum<br>Integral to<br>membrane |
| +                     | MTHFD2 | AL560341  | Methylenetetrahydrof<br>olate dehydrogenase<br>(NAD+) activity<br>Oxidoreductase<br>activity<br>Electron transporter<br>activity<br>Hydrolase activity<br>Magnesium ion<br>binding<br>Methenyltetrahydrofol<br>ate cyclohydrolase<br>activity | One-carbon<br>compound<br>metabolism<br>Folic acid and<br>derivative<br>biosynthesis | Mitochondrio<br>n                                   |
| <b>Signaling</b>      |        |           |                                                                                                                                                                                                                                               |                                                                                      |                                                     |
| +                     | ADAM15 | BG766668  | Metalloendopeptidas<br>e activity<br>Protein binding<br>Zinc ion binding<br>SH3 domain binding<br>Hydrolase activity                                                                                                                          | Proteolysis and<br>peptidolysis<br>Cell-matrix<br>adhesion                           | Integral to<br>membrane                             |
| +                     | PDE4D  | U02882    | 3',5'-cyclic-nucleotide<br>phosphodiesterase<br>activity<br>CAMP-specific<br>phosphodiesterase<br>activity<br>Glutamyl-tRNA<br>reductase activity<br>Hydrolase activity                                                                       | Signal transduction<br>Cyclic nucleotide<br>metabolism<br>Porphyrin<br>biosynthesis  | Soluble<br>fraction<br>Insoluble<br>fraction        |

Supplementary Material (ESI) for Chemical Communications  
 This journal is © The Royal Society of Chemistry 2005

|   |         |          |                                                                                                                                                    |                                                                                                                                                                                                                                                                                                                                 |                                               |
|---|---------|----------|----------------------------------------------------------------------------------------------------------------------------------------------------|---------------------------------------------------------------------------------------------------------------------------------------------------------------------------------------------------------------------------------------------------------------------------------------------------------------------------------|-----------------------------------------------|
| + | DUSP3   | AL555009 | Hydrolase activity<br>Protein tyrosine<br>phosphatase activity<br>Protein<br>tyrosine/serine/threon<br>ine phosphatase<br>activity                 | Protein amino acid<br>dephosphorylation                                                                                                                                                                                                                                                                                         | n.d.                                          |
| + | SQSTM1  | BG164025 | Protein kinase<br>binding<br>SH2 domain binding<br>Ubiquitin binding<br>Zinc ion binding                                                           | Endosome<br>transport<br>Intracellular<br>signaling cascade<br>Positive regulation<br>of transcription from<br>Pol II promoter<br>Protein localization<br>Regulation of<br>I-kappaB<br>kinase/NF-kappaB<br>cascade<br>Response to stress                                                                                        | Cytosol                                       |
| + | STC2    | AB012664 | Hormone activity                                                                                                                                   | Response to<br>nutrients<br>Cell surface<br>receptor linked<br>signal transduction<br>Cell-cell signaling                                                                                                                                                                                                                       | Extracellular<br>region                       |
| + | ARHGEF2 | BG248725 | Rac<br>guanyl-nucleotide<br>exchange factor<br>activity<br>Microtubule binding<br>Rho GTPase binding<br>Diacylglycerol binding<br>Zinc ion binding | Cell surface<br>receptor linked<br>signal transduction<br>Cellular<br>morphogenesis<br>Microtubule<br>stabilization<br>Regulation of Rho<br>protein signal<br>transduction<br>Intracellular protein<br>transport<br>Intracellular<br>signaling cascade<br>Actin filament<br>organization<br>Regulation of cell<br>proliferation | Microtubule                                   |
| + | IL8     | AV717082 | Chemokine activity<br>Protein binding<br>Interleukin-8 receptor<br>binding                                                                         | Cell cycle arrest<br>Cell motility<br>Negative regulation<br>of cell proliferation<br>Cell-cell signaling<br>Neutrophil<br>activation<br>Neutrophil<br>chemotaxis<br>Chemotaxis                                                                                                                                                 | Extracellular<br>space<br>Soluble<br>fraction |

|   |       |           |                                             |                                                                                                                                                                                                                                                                                                                                                 |                                                                           |
|---|-------|-----------|---------------------------------------------|-------------------------------------------------------------------------------------------------------------------------------------------------------------------------------------------------------------------------------------------------------------------------------------------------------------------------------------------------|---------------------------------------------------------------------------|
|   |       |           |                                             | G-protein coupled<br>receptor protein<br>signaling pathway<br>Regulation of cell<br>adhesion<br>Immune response<br>Angiogenesis<br>Regulation of<br>retroviral genome<br>replication<br>Induction of positive<br>chemotaxis<br>Calcium-mediated<br>signaling<br>Intracellular<br>signaling cascade<br>Cell proliferation<br>Cell-cell signaling |                                                                           |
| + | AREG  | AL546917  | Cytokine activity<br>Growth factor activity |                                                                                                                                                                                                                                                                                                                                                 | Extracellular<br>space<br>Integral to<br>membrane                         |
| + | AREG  | AL546917  | Cytokine activity<br>Growth factor activity | Cell proliferation<br>Cell-cell signaling                                                                                                                                                                                                                                                                                                       | Extracellular<br>space<br>Integral to<br>membrane                         |
| + | SHOC2 | AF068920  | Molecular_function<br>unknown               | Ras protein signal<br>transduction<br>Fibroblast growth<br>factor receptor<br>signaling pathway                                                                                                                                                                                                                                                 | Cytoplasm                                                                 |
| + | TJP1  | NM_003257 | Protein binding                             | Intercellular<br>junction assembly                                                                                                                                                                                                                                                                                                              | Membrane<br>Membrane<br>fraction<br>Septate<br>junction<br>Tight junction |
| + | PKD1  | AW963270  | Sugar binding                               | Calcium-independe<br>nt cell-matrix<br>adhesion<br>Homophilic cell<br>adhesion<br>Morphogenesis<br>Neuropeptide<br>signaling pathway<br>Intracellular<br>signaling cascade<br>Regulation of cell<br>growth                                                                                                                                      | Integral to<br>plasma<br>membrane                                         |
| + | SSI-3 | AB006967  | n.d.                                        |                                                                                                                                                                                                                                                                                                                                                 | n.d.                                                                      |

Supplementary Material (ESI) for Chemical Communications  
This journal is © The Royal Society of Chemistry 2005

|   |       |           |                                                                                                                                         |                                                                                                                                                                                                                                                                          |                                 |
|---|-------|-----------|-----------------------------------------------------------------------------------------------------------------------------------------|--------------------------------------------------------------------------------------------------------------------------------------------------------------------------------------------------------------------------------------------------------------------------|---------------------------------|
| + | SCYB5 | BC008376  | Chemokine activity                                                                                                                      | Immune response<br>Inflammatory response<br>Positive regulation of cell proliferation<br>Signal transduction<br>Cell-cell signaling<br>Chemotaxis                                                                                                                        | Extracellular region            |
| + | IL6   | M54894    | Interleukin-6 receptor binding<br>Cytokine activity                                                                                     | Negative regulation of cell proliferation<br>Positive regulation of cell proliferation<br>Acute-phase response<br>Cell surface receptor linked signal transduction<br>Cell-cell signaling<br>Humoral immune response                                                     | Extracellular space             |
| + | DGKD  | D63479    | Protein binding<br>Diacylglycerol binding<br>Diacylglycerol kinase activity                                                             | Second-messenger-mediated signaling<br>Diacylglycerol metabolism<br>Epidermal growth factor receptor signaling pathway<br>Cell growth<br>Intracellular signaling cascade<br>Immune response<br>Development<br>Protein homooligomerization<br>Protein kinase C activation | Cytoplasm                       |
| + | FKBP8 | BG326971  | n.d.                                                                                                                                    | Intracellular signaling cascade<br>Protein folding                                                                                                                                                                                                                       | n.d.                            |
| + | APLP2 | NM_001642 | Serine-type endopeptidase inhibitor activity<br>DNA binding<br>Binding                                                                  | G-protein coupled receptor protein signaling pathway                                                                                                                                                                                                                     | Integral to membrane<br>Nucleus |
| + | OGT   | NM_003605 | Acetylglucosaminyltransferase activity<br>Protein binding<br>Transferase activity<br>Transferase activity, transferring glycosyl groups | Response to nutrients<br>Signal transduction<br>O-linked glycosylation                                                                                                                                                                                                   | Cytosol<br>Nucleus              |

Supplementary Material (ESI) for Chemical Communications  
This journal is © The Royal Society of Chemistry 2005

|                                                           |        |           |                                                                                                                                                                  |                                                                                                                                                                                                                                                                           |                                                        |
|-----------------------------------------------------------|--------|-----------|------------------------------------------------------------------------------------------------------------------------------------------------------------------|---------------------------------------------------------------------------------------------------------------------------------------------------------------------------------------------------------------------------------------------------------------------------|--------------------------------------------------------|
| +                                                         | ZYX    | NM_003461 | Zinc ion binding<br>Protein binding                                                                                                                              | Cell adhesion<br>Cell-cell signaling<br>Signal transduction                                                                                                                                                                                                               | Integral to plasma membrane                            |
| +                                                         | NRGN   | AW117600  | Calmodulin binding                                                                                                                                               | Signal transduction<br>Neurogenesis                                                                                                                                                                                                                                       | n.d.                                                   |
| –                                                         | MGST2  | W73858    | Transferase activity<br>Enzyme activator activity<br>Glutathione transferase activity                                                                            | Antimicrobial humoral response (sensu Vertebrata)<br>Cell-cell signaling<br>Leukotriene biosynthesis<br>Signal transduction                                                                                                                                               | Integral to membrane<br>Membrane fraction<br>Microsome |
| –                                                         | YWHAH  | NM_003405 | Protein kinase C inhibitor activity<br>Protein kinase binding<br>Actin binding<br>Insulin-like growth factor receptor binding<br>Protein domain specific binding | Regulation of mitosis<br>Regulation of neuron differentiation<br>Cytoskeleton organization and biogenesis<br>Regulation of signal transduction<br>Regulation of synaptic plasticity<br>Negative regulation of apoptosis<br>Negative regulation of protein kinase activity | Cytoplasm                                              |
| <b>Cell cycle, proliferation, differentiation, growth</b> |        |           |                                                                                                                                                                  |                                                                                                                                                                                                                                                                           |                                                        |
| +                                                         | PES1   | NM_014303 |                                                                                                                                                                  | Morphogenesis                                                                                                                                                                                                                                                             | Nucleus                                                |
| +                                                         | ROD1   | BG168693  | mRNA processing                                                                                                                                                  | Morphogenesis                                                                                                                                                                                                                                                             | Nucleus                                                |
| +                                                         | FRAP1  | NM_004958 | Inositol or phosphatidylinositol kinase activity<br>Transferase activity                                                                                         | DNA recombination<br>DNA repair<br>Regulation of cell cycle                                                                                                                                                                                                               | RNA binding<br>Phosphoinositide 3-kinase complex       |
| +                                                         | NOLC1  | NM_004741 | ATP binding<br>GTP binding                                                                                                                                       | Cell cycle<br>Mitosis<br>RRNA processing                                                                                                                                                                                                                                  | Cytoplasm<br>Nucleolus                                 |
| +                                                         | BTG1   | NM_001731 |                                                                                                                                                                  | Cell growth and/or maintenance                                                                                                                                                                                                                                            |                                                        |
| +                                                         | PPP2R4 | AU125210  | Phosphatase activator activity<br>Protein phosphatase type 2A regulator activity<br>Protein tyrosine phosphatase activator activity                              | Protein amino acid dephosphorylation                                                                                                                                                                                                                                      | Soluble fraction                                       |

|                  |          |           |                                                                                                                                                                |                                                                                                                                                                       |                                                  |
|------------------|----------|-----------|----------------------------------------------------------------------------------------------------------------------------------------------------------------|-----------------------------------------------------------------------------------------------------------------------------------------------------------------------|--------------------------------------------------|
| +                | QSCN6    | NM_002826 | Electron transporter activity                                                                                                                                  | Cell growth and/or maintenance<br>Electron transport<br>Negative regulation of cell proliferation<br>Regulation of cell cycle<br>Regulation of cell growth            | Cellular_component unknown                       |
| –                | STK15    | NM_003600 | Protein binding<br>Protein serine/threonine kinase activity<br>Transferase activity<br>ATP binding<br>Zinc ion binding                                         | Cell cycle<br>Mitosis<br>Protein amino acid phosphorylation                                                                                                           | Spindle<br>Nucleus                               |
| –                | CRIP1    | BI222747  |                                                                                                                                                                | Antimicrobial humoral response (sensu Vertebrata)<br>Cell proliferation                                                                                               | Cytoplasm                                        |
| –                | S100A4   | BG619887  | Calcium ion binding                                                                                                                                            | n.d.                                                                                                                                                                  | n.d.                                             |
| –                | PCNA     | NM_002592 | DNA binding<br>DNA polymerase processivity factor activity                                                                                                     | Cell proliferation<br>Regulation of DNA replication<br>Regulation of cell cycle<br>DNA repair<br>DNA replication                                                      | Delta-DNA polymerase cofactor complex<br>Nucleus |
| <b>Apoptosis</b> |          |           |                                                                                                                                                                |                                                                                                                                                                       |                                                  |
| +                | C20orf97 | NM_021158 | ATP binding<br>Protein kinase binding<br>Protein kinase inhibitor activity<br>Transcription corepressor activity<br>Protein binding<br>Protein kinase activity | Activation of MAPK<br>Apoptosis<br>Negative regulation of protein kinase activity<br>Regulation of transcription, DNA-dependent<br>Protein amino acid phosphorylation | Nucleus                                          |
| +                | PEA15    | BC002426  | Protein binding<br>Sugar porter activity                                                                                                                       | Regulation of apoptosis<br>Transport<br>Anti-apoptosis<br>Negative regulation of glucose import                                                                       | Microtubule associated complex                   |
| +                | FN14     | AI827127  | Protein binding<br>Receptor activity                                                                                                                           | Cell adhesion<br>Cell motility<br>Development<br>Angiogenesis<br>Apoptosis                                                                                            | Integral to membrane                             |

Supplementary Material (ESI) for Chemical Communications  
This journal is © The Royal Society of Chemistry 2005

|                   |       |           |                                                                                                                       |                                                                                                                                 |                                                         |
|-------------------|-------|-----------|-----------------------------------------------------------------------------------------------------------------------|---------------------------------------------------------------------------------------------------------------------------------|---------------------------------------------------------|
| +                 | PPM1F | NM_014634 | Protein serine/threonine phosphatase activity<br>Hydrolase activity<br>Magnesium ion binding<br>Manganese ion binding | Protein amino acid dephosphorylation<br>Apoptosis                                                                               | Protein serine/threonine phosphatase complex            |
| <b>Catabolism</b> |       |           |                                                                                                                       |                                                                                                                                 |                                                         |
| +                 | HMOX1 | AU129800  | Heme oxygenase (decyclizing) activity<br>Oxidoreductase activity<br>Signal transducer activity                        | Heme oxidation<br>Positive regulation of I-kappaB kinase/NF-kappaB cascade                                                      | Membrane fraction<br>Microsome<br>Endoplasmic reticulum |
| <b>Metabolism</b> |       |           |                                                                                                                       |                                                                                                                                 |                                                         |
| +                 | HDLBP | XM_042326 | RNA binding<br>Lipid transporter activity                                                                             | Lipid transport<br>Cholesterol metabolism                                                                                       | Plasma membrane<br>Nucleus                              |
| +                 | ASNS  | NM_133436 | Nucleic acid binding<br>Asparagine synthase (glutamine-hydrolyzing) activity<br>Ligase activity                       | Glutamine metabolism<br>Metabolism<br>Asparagine biosynthesis                                                                   | Soluble fraction                                        |
| +                 | PYGB  | BG575502  | Phosphorylase activity<br>Transferase activity, transferring glycosyl groups                                          | Carbohydrate metabolism<br>Glycogen catabolism                                                                                  | n.d.                                                    |
| +                 | GFPT1 | NM_002056 | Sugar binding<br>Transferase activity<br>Glutamine-fructose-6-phosphate transaminase (isomerizing) activity           | Metabolism<br>Carbohydrate biosynthesis<br>Energy reserve metabolism<br>Fructose 6-phosphate metabolism<br>Glutamine metabolism | Cytoplasm                                               |
| +                 | SHMT2 | NM_005412 | Transferase activity<br>Glycine hydroxymethyltransferase activity                                                     | Glycine metabolism<br>One-carbon compound metabolism<br>L-serine metabolism                                                     | Mitochondrion                                           |
| +                 | CPS1  | BG761337  | Ligase activity<br>ATP binding<br>Carbamoyl-phosphate synthase (ammonia) activity                                     | Pyrimidine base biosynthesis<br>Urea cycle<br>Arginine biosynthesis                                                             | Mitochondrion                                           |
| +                 | UGDH  | NM_003359 | Oxidoreductase activity                                                                                               | Glycosaminoglycan biosynthesis                                                                                                  | n.d.                                                    |

|                  |          |           |                                                                                                                                                                                                                                                     |                                                                                                                                                            |                                                                                                    |
|------------------|----------|-----------|-----------------------------------------------------------------------------------------------------------------------------------------------------------------------------------------------------------------------------------------------------|------------------------------------------------------------------------------------------------------------------------------------------------------------|----------------------------------------------------------------------------------------------------|
| +                | PSA      | NM_058179 | UDP-glucose<br>6-dehydrogenase<br>activity<br>Electron transporter<br>activity<br>Phosphoserine<br>transaminase activity<br>Transferase activity                                                                                                    | UDP-glucose<br>metabolism<br>UDP-glucuronate<br>biosynthesis<br>Electron transport<br>L-serine<br>biosynthesis<br>Metabolism<br>Pyridoxine<br>biosynthesis | n.d.                                                                                               |
| +                | UP       | BG492119  | Transferase activity,<br>transferring glycosyl<br>groups<br>Uridine<br>phosphorylase<br>activity                                                                                                                                                    | Nucleoside<br>metabolism<br>Nucleotide<br>catabolism                                                                                                       | Cytoplasm                                                                                          |
| –                | CYP7B1   | NM_004820 | Monooxygenase<br>activity<br>Oxysterol<br>7-alpha-hydroxylase<br>activity                                                                                                                                                                           | Bile acid<br>biosynthesis<br>Cholesterol<br>metabolism<br>Electron transport                                                                               | Microsome<br>Endoplasmic<br>reticulum<br>Membrane                                                  |
| –                | NME4     | AV704094  | Kinase activity<br>Nucleoside-diphosph<br>ate kinase activity<br>Transferase activity<br>ATP binding                                                                                                                                                | Nucleoside<br>metabolism<br>CTP biosynthesis<br>GTP biosynthesis<br>UTP biosynthesis                                                                       | Mitochondrio<br>n                                                                                  |
| –                | GSTM2    | NM_000848 | Glutathione<br>transferase activity<br>Transferase activity                                                                                                                                                                                         | Metabolism                                                                                                                                                 |                                                                                                    |
| <b>Transport</b> |          |           |                                                                                                                                                                                                                                                     |                                                                                                                                                            |                                                                                                    |
| +                | ATP6V0D1 | NM_004691 | Hydrogen-transportin<br>g ATPase activity,<br>rotational mechanism<br>Hydrogen-transportin<br>g ATP synthase<br>activity, rotational<br>mechanism<br>Hydrolase activity                                                                             | Proton transport<br>ATP synthesis<br>coupled proton<br>transport                                                                                           | Proton-transp<br>orting<br>two-sector<br>ATPase<br>complex                                         |
| +                | ATP2A2   | NM_001681 | Hydrolase activity<br>ATP binding<br>Hydrolase activity,<br>acting on acid<br>anhydrides,<br>catalyzing<br>transmembrane<br>movement of<br>substances<br>Calcium ion binding<br>Magnesium ion<br>binding<br>Calcium-transporting<br>ATPase activity | Cation transport<br>Cell adhesion<br>Proton transport<br>Epidermis<br>development<br>Transport<br>Calcium ion<br>transport<br>Metabolism                   | Microsome<br>Endoplasmic<br>reticulum<br>Integral to<br>plasma<br>membrane<br>Membrane<br>fraction |
| +                | SLC1A4   | NM_003038 | Neutral amino acid<br>transporter activity<br>Sodium:dicarboxylate<br>symporter activity<br>Symporter activity                                                                                                                                      | Dicarboxylic acid<br>transport<br>Neutral amino acid<br>transport<br>Transport                                                                             | Integral to<br>plasma<br>membrane<br>Membrane<br>fraction                                          |
| +                | VAT1     | NM_006373 | DNA binding                                                                                                                                                                                                                                         | Cell growth                                                                                                                                                | Integral to                                                                                        |

|   |         |           |                                                                                                                                                                                                                                                   |                                                                                                             |                                                            |
|---|---------|-----------|---------------------------------------------------------------------------------------------------------------------------------------------------------------------------------------------------------------------------------------------------|-------------------------------------------------------------------------------------------------------------|------------------------------------------------------------|
|   |         |           | NADPH:quinone reductase activity<br>Alcohol dehydrogenase activity,<br>zinc-dependent Oxidoreductase activity<br>Zinc ion binding                                                                                                                 |                                                                                                             | membrane<br>Nucleus<br>Synaptic vesicle                    |
| + | VAT1    | BF725927  | DNA binding<br>NADPH:quinone reductase activity<br>Alcohol dehydrogenase activity,<br>zinc-dependent Oxidoreductase activity<br>Zinc ion binding                                                                                                  | Cell growth                                                                                                 | Integral to membrane<br>Nucleus<br>Synaptic vesicle        |
| + | ATP2B1  | NM_001682 | Calmodulin binding<br>Hydrolase activity<br>Hydrolase activity, acting on acid anhydrides, catalyzing transmembrane movement of substances<br>ATP binding<br>Magnesium ion binding<br>Calcium ion binding<br>Calcium-transporting ATPase activity | Cation transport<br>Metabolism<br>Calcium ion transport                                                     | Integral to plasma membrane                                |
| + | ATP6B2  | BE899262  | Hydrogen-transporting ATPase activity, rotational mechanism<br>Hydrolase activity<br>ATP binding<br>Hydrogen-exporting ATPase activity, phosphorylative mechanism<br>Hydrogen-transporting ATP synthase activity, rotational mechanism            | ATP synthesis coupled proton transport<br>Energy coupled proton transport, against electrochemical gradient | Proton-transporting two-sector ATPase complex<br>Cytoplasm |
| + | SLC38A1 | NM_030674 | Sodium:amino acid symporter activity<br>Neutral amino acid transporter activity<br>Amino acid-polyamine transporter activity                                                                                                                      | Neutral amino acid transport<br>Amino acid transport                                                        | Integral to membrane<br>Membrane                           |
| + | ZNF263  | NM_005741 | Transcription factor activity<br>Zinc ion binding                                                                                                                                                                                                 | Regulation of transcription, DNA-dependent                                                                  | Nucleus                                                    |

Supplementary Material (ESI) for Chemical Communications  
This journal is © The Royal Society of Chemistry 2005

|                                                     |          |           |                                                                                |                                                                                               |                                           |
|-----------------------------------------------------|----------|-----------|--------------------------------------------------------------------------------|-----------------------------------------------------------------------------------------------|-------------------------------------------|
| +                                                   | PP15     | BE409333  | Protein transporter activity                                                   | Protein transport<br>Protein-nucleus import                                                   | Nucleus                                   |
| +                                                   | KPNB2    | NM_153188 | Nuclear localization sequence binding<br>Protein transporter activity          | Protein transport<br>Protein-nucleus import, docking<br>Protein-nucleus import, translocation | Cytoplasm<br>Nuclear pore<br>Nucleus      |
| +                                                   | ALS2CR3  | NM_015049 | Intracellular transporter activity<br>Receptor binding                         | Neurotransmitter transport                                                                    | Cytoplasm<br>Plasma membrane              |
| +                                                   | SLC7A5   | AB018009  | Amino acid permease activity<br>Neutral amino acid transporter activity        | Amino acid metabolism<br>Amino acid transport<br>Transport                                    | Integral to membrane<br>Plasma membrane   |
| +                                                   | KIAA0062 | D31887    | Metal ion transporter activity                                                 | Metal ion transport                                                                           | Membrane                                  |
| +                                                   | XPOT     | NM_007235 | TRNA binding                                                                   | Transport                                                                                     | Nucleus                                   |
| +                                                   | SLC3A2   | NM_002394 | Calcium:sodium antiporter activity<br>Alpha-amylase activity                   | Carbohydrate metabolism<br>Cell growth<br>Amino acid transport<br>Calcium ion transport       | Integral to membrane                      |
| +                                                   | MB       | NM_005368 | Oxygen transporter activity<br>Electron transporter activity                   | Oxygen transport<br>Transport<br>Muscle development                                           |                                           |
| <b>Extracellular matrix, motility, cytoskeleton</b> |          |           |                                                                                |                                                                                               |                                           |
| +                                                   | COL4A4   | NM_000092 | Extracellular matrix structural constituent                                    | Phosphate transport<br>Long-term strengthening of neuromuscular junction                      | Collagen<br>Collagen type IV<br>Cytoplasm |
| +                                                   | MYO1C    | BE395925  | Actin binding<br>Calmodulin binding<br>Motor activity<br>ATP binding           | Detection of sound                                                                            | Unconventional myosin                     |
| +                                                   | ACTN1    | AU118989  | Actin binding<br>Calcium ion binding<br>Structural constituent of cytoskeleton | n.d.                                                                                          | Actin cytoskeleton                        |

Supplementary Material (ESI) for Chemical Communications  
This journal is © The Royal Society of Chemistry 2005

|              |          |           |                                                                                                                                          |                                                                                                                   |                                                                                  |
|--------------|----------|-----------|------------------------------------------------------------------------------------------------------------------------------------------|-------------------------------------------------------------------------------------------------------------------|----------------------------------------------------------------------------------|
| +            | COL8A1   | NM_001850 | Protein binding<br>Structural molecule<br>activity                                                                                       | Phosphate<br>transport<br>Cell adhesion                                                                           | Extracellular<br>matrix (sensu<br>Metazoa)<br>Collagen type<br>VIII<br>Cytoplasm |
| +            | SPTBN1   | NM_003128 | Structural constituent<br>of cytoskeleton<br>Actin binding<br>Calmodulin binding                                                         | n.d.                                                                                                              | Spectrin<br>Cytoskeleton<br>Membrane                                             |
| –            | ESTs     | BC021909  | GTP binding<br>GTPase activity<br>MHC class I protein<br>binding<br>Structural molecule<br>activity                                      | Microtubule<br>polymerization<br>Microtubule-based<br>movement<br>Natural killer cell<br>mediated<br>cytotoxicity | Tubulin                                                                          |
| –            | TUBB     | BG762520  | Unfolded protein<br>binding<br>GTP binding<br>GTPase activity<br>MHC class I protein<br>binding<br>Structural molecule<br>activity       | Microtubule<br>polymerization<br>Microtubule-based<br>movement<br>Natural killer cell<br>mediated<br>cytotoxicity | Tubulin                                                                          |
| <b>Other</b> |          |           |                                                                                                                                          |                                                                                                                   |                                                                                  |
| +            | KIAA0731 | AL133034  | n.d.                                                                                                                                     | n.d.                                                                                                              | n.d.                                                                             |
| +            | KIAA0878 | AU138104  | GTPase activity<br>Protein binding                                                                                                       | Biological_process<br>unknown                                                                                     | n.d.                                                                             |
| +            | ESTs     | AU138357  | Sodium:amino acid<br>symporter activity<br>Neutral amino acid<br>transporter activity<br>Amino<br>acid-polyamine<br>transporter activity | Neutral amino acid<br>transport<br>Amino acid<br>transport                                                        | Integral to<br>membrane<br>Membrane                                              |
| +            | MGEA6    | BF980666  | 3'-5'-exoribonuclease<br>activity<br>RNA binding<br>Enzyme activator<br>activity<br>Protein binding                                      | RNA processing                                                                                                    | n.d.                                                                             |
| +            | KIAA0063 | NM_014876 | n.d.                                                                                                                                     | n.d.                                                                                                              | n.d.                                                                             |
| +            | NT5B     | NM_012229 | 5'-nucleotidase<br>activity<br>Hydrolase activity                                                                                        | n.d.                                                                                                              | Cytosol                                                                          |
| +            | MGC5139  | NM_000017 | Butyryl-CoA<br>dehydrogenase                                                                                                             | Electron transport<br>Energy pathways                                                                             | Mitochondrio<br>n                                                                |

Supplementary Material (ESI) for Chemical Communications  
This journal is © The Royal Society of Chemistry 2005

|   |          |           |                                                                             |                                                                                                                                               |                          |
|---|----------|-----------|-----------------------------------------------------------------------------|-----------------------------------------------------------------------------------------------------------------------------------------------|--------------------------|
|   |          |           | activity<br>Oxidoreductase<br>activity                                      | Fatty acid<br>beta-oxidation<br>Fatty acid<br>metabolism                                                                                      |                          |
| + | KIAA0226 | AI360844  | n.d.                                                                        | n.d.                                                                                                                                          | n.d.                     |
| + | ESTs     | BG434340  | Transcriptional<br>repressor activity<br>Double-stranded<br>DNA binding     | Immune response<br>Monocyte<br>differentiation<br>Regulation of<br>transcription,<br>DNA-dependent<br>Response to virus<br>Cell proliferation | Nucleus                  |
| + | unknown  | unknown   | n.d.                                                                        | n.d.                                                                                                                                          | n.d.                     |
| + | UBC      | NM_021009 |                                                                             |                                                                                                                                               | Nucleus                  |
| + | OAZIN    | NM_148174 | Catalytic activity<br>Enzyme inhibitor<br>activity                          | Polyamine<br>biosynthesis<br>Muscle<br>development                                                                                            | n.d.<br>n.d.             |
| – | HSPC009  | NM_014019 | n.d.                                                                        | n.d.                                                                                                                                          | n.d.                     |
| – | MLP      | NM_023009 | Calmodulin binding                                                          | n.d.                                                                                                                                          | n.d.                     |
| – | PCYT1B   | AL521633  | Transferase activity<br>Choline-phosphate<br>cytidyltransferase<br>activity | Phospholipid<br>biosynthesis<br>Phosphatidylcholin<br>e biosynthesis<br>Biosynthesis                                                          | Endoplasmic<br>reticulum |
| – | unknown  | unknown   | n.d.                                                                        | n.d.                                                                                                                                          | n.d.                     |
